# Supplementary material
Source: bioRxiv or medRxiv preprint supplement (https://www.biorxiv.org/highwire/filestream/10635/field_highwire_adjunct_files/0/039255-1.pdf)
Supplement: Supplementary file [file 039255-1.pdf]

## Supplementary Figures and Tables for

Identification and characterization of novel Bovine Leukemia Virus (BLV) antisense transcripts reveals their constitutive expression in leukemic and pre-leukemic clones

Keith Durkin, Nicolas Rosewick, Maria Artesi, Vincent Hahaut, Philip Griebel, Natasa Arsic, Arsène Burny, Michel Georges & Anne Van den Broeke

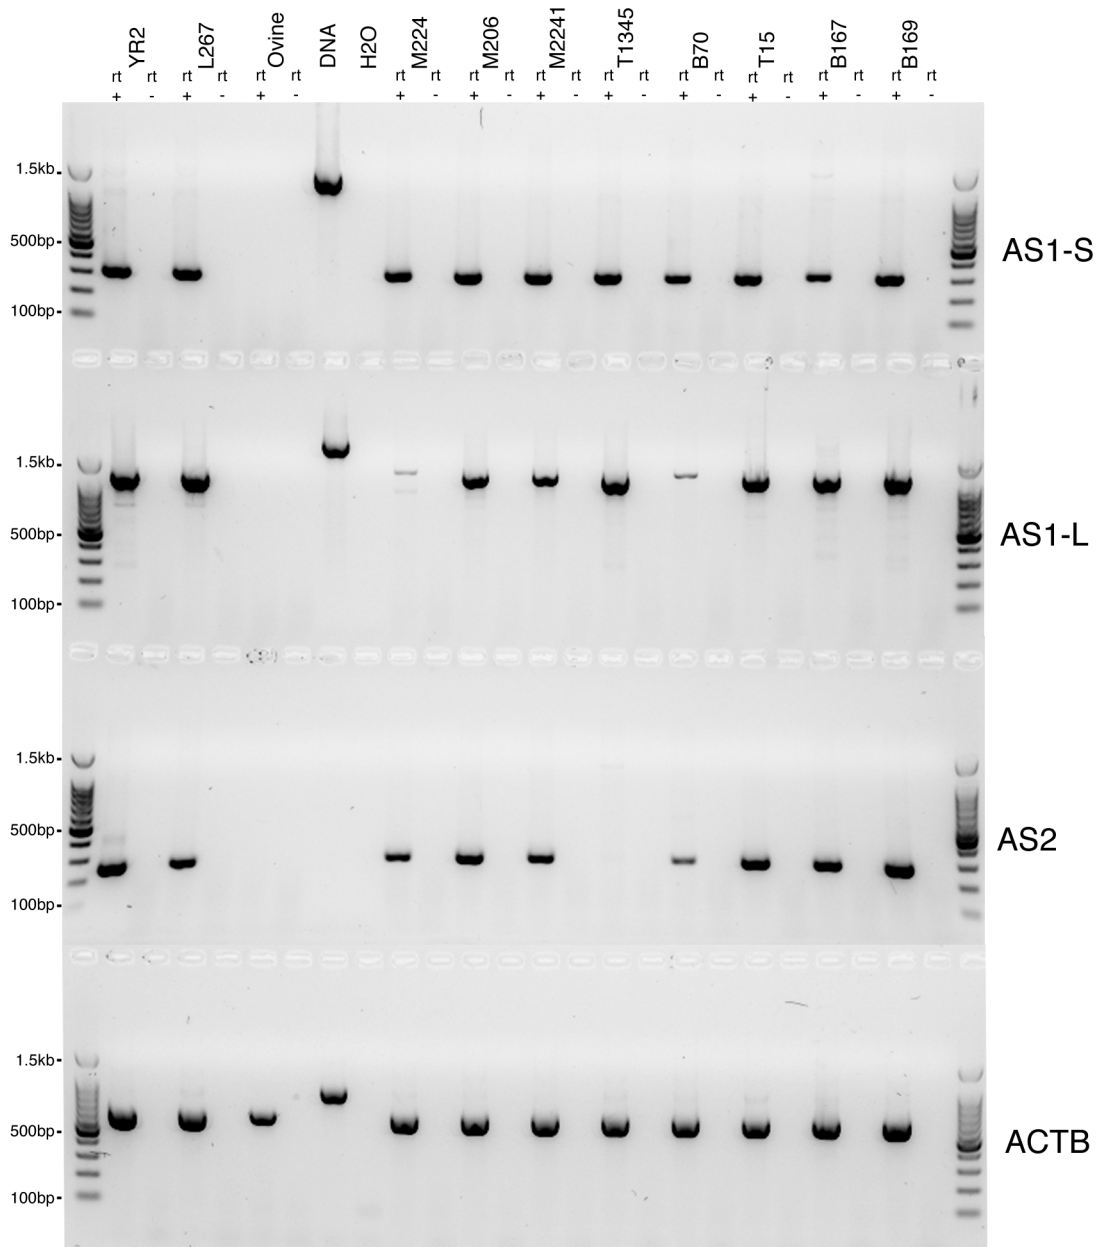

### Sup Fig 1. RT-PCR in bovine and ovine tumors

Extended version of Fig 1 B showing RT-PCR results for three ovine (M224, M206, M2241) and five bovine (T1345, B70, T15, B167, B169) tumors. The lack of amplification in T1345 for AS2 is expected as this tumour carries a provirus with a large internal deletion that removes the second exon of AS2 (See Figure 7). (Rt+ reverse transcriptase positive, Rt- reverse transcriptase negative).

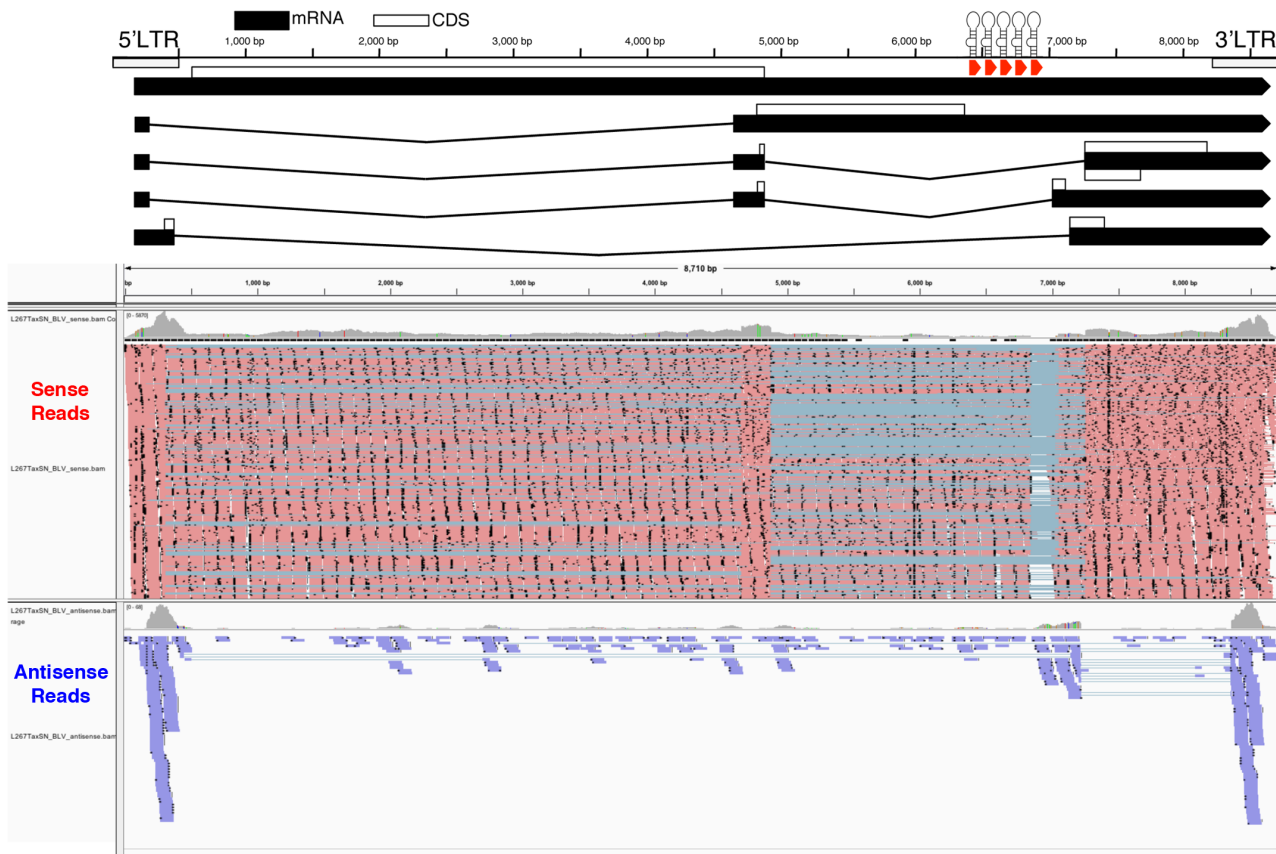

## L267<sub>LTaxSN</sub>

### Sup Fig 2. Sense and antisense transcription from the BLV provirus

Ideogram of the BLV provirus with IGV screenshot showing sense (red) and antisense (blue) reads from a stranded RNA library using the L267<sub>LTaxSN</sub> cell line. Despite robust sense transcription induced by retroviral vector-mediated expression of Tax, antisense transcripts are still present.

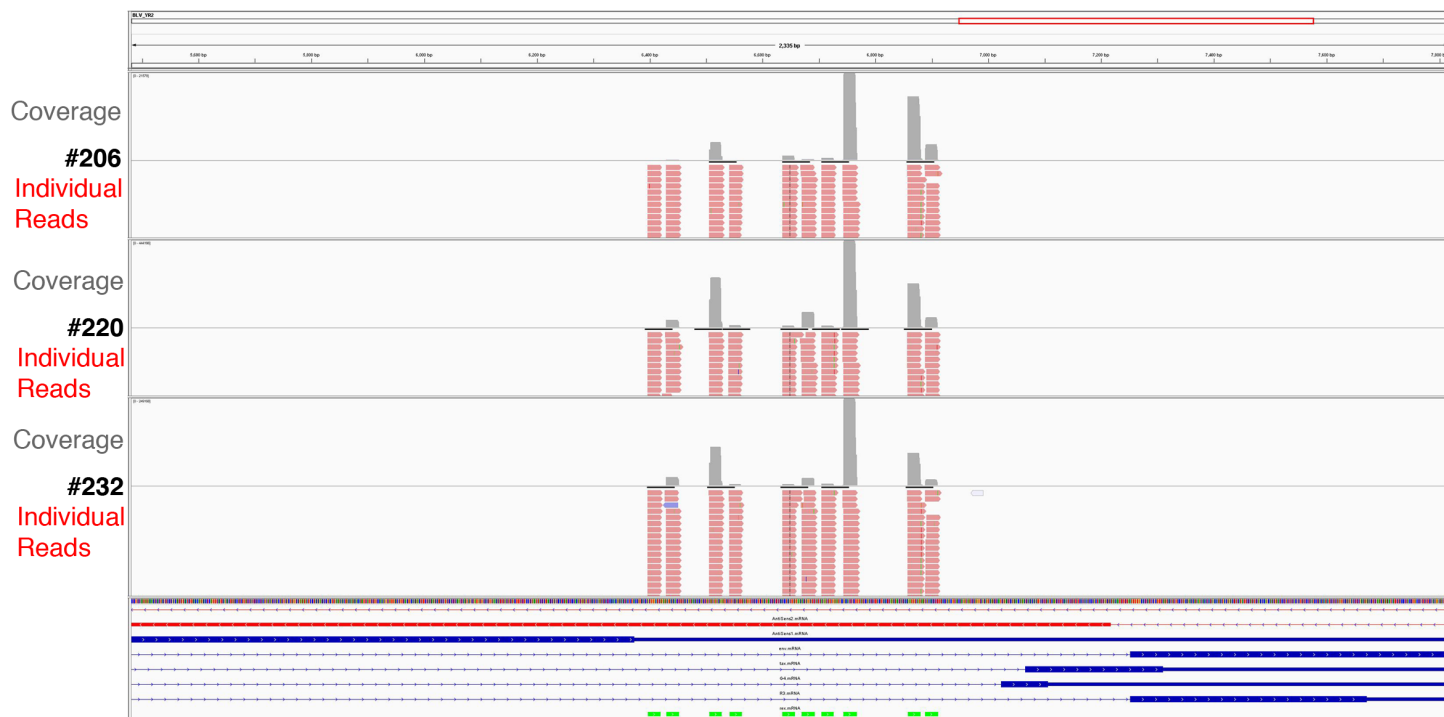

**Sup Fig 3. BLV microRNA expression is present during the polyclonal stage of infection.**

Small RNA HTS reads derived from three sheep during the polyclonal stage of infection mapped to the BLV genome. The samples used correspond to those in Fig 2.

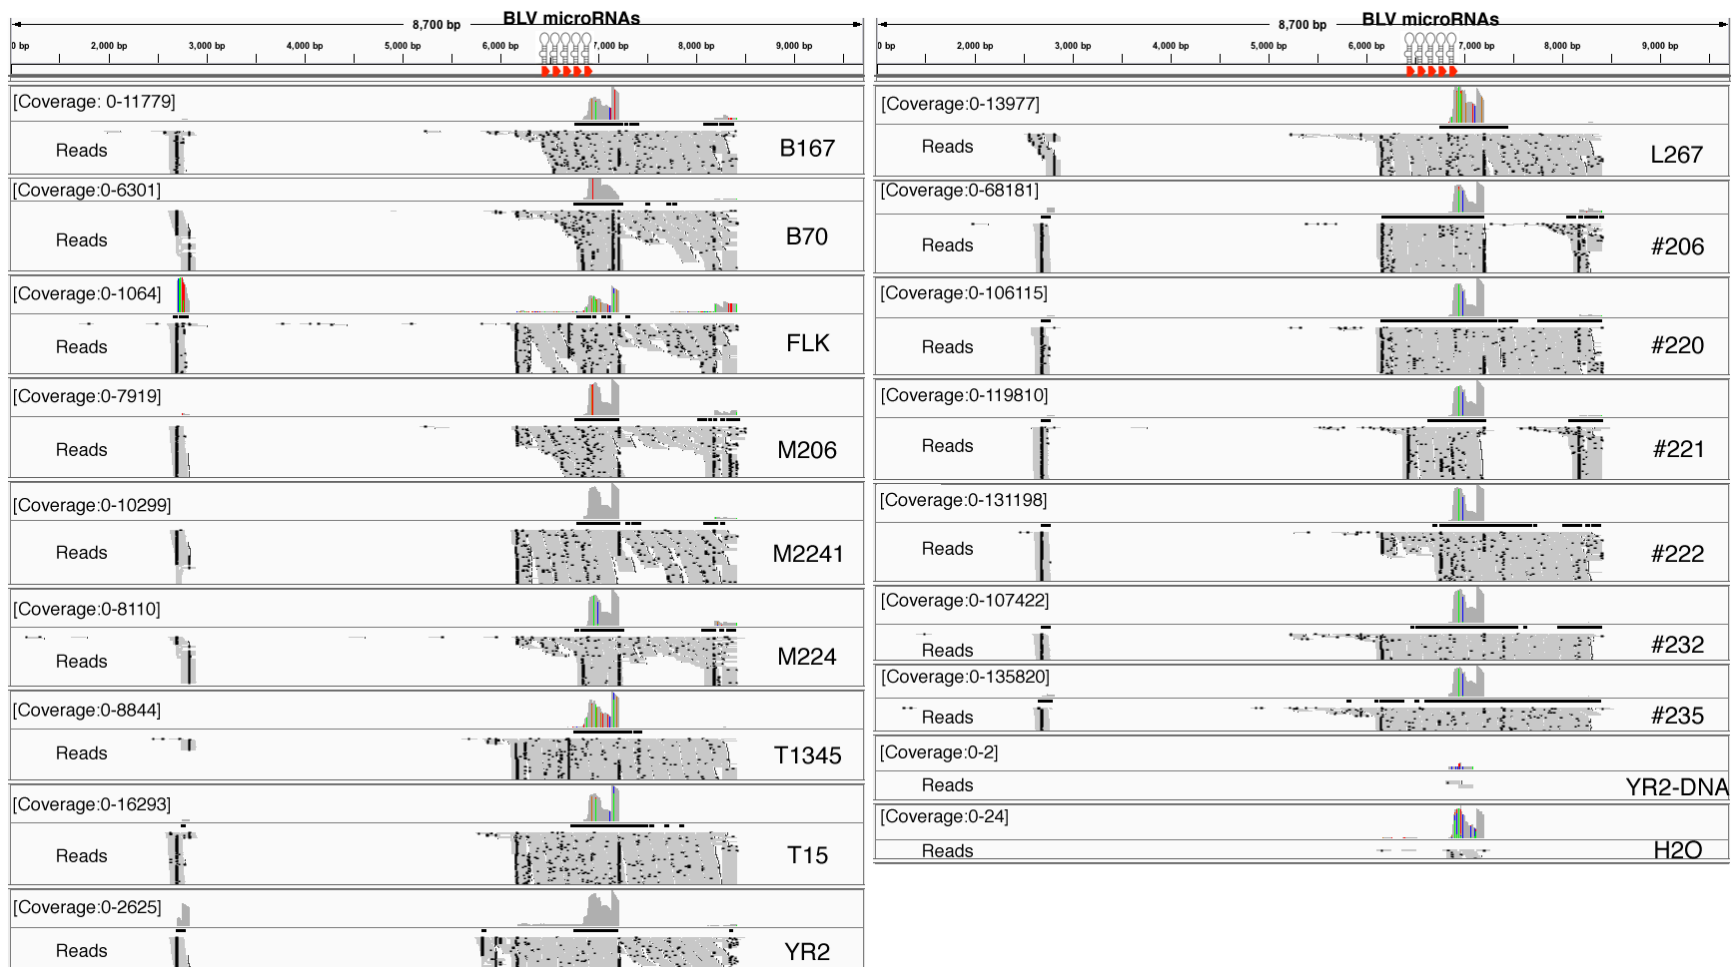

**Sup Fig 4. Eighteen 3'RACE libraries mapped to the BLV genome**

Screen shot from IGV with the position of the BLV microRNAs indicated, showing reads mapping to the BLV genome for cell lines YR2, L267, FLK, three ovine tumors, four bovine tumors and the 6 asymptomatic BLV infected sheep 17 months post inoculation. In each library, coverage is concentrated just after the BLV microRNA region marking the 3' end of AS1-S. A much smaller fraction of reads extends beyond the BLV microRNA region (AS1-L) or spliced further upstream (AS2). As a negative control, libraries were prepared using YR2 DNA and H2O as template. In both of these libraries a small number of reads were observed, due either to cross contamination between samples during the library preparation or inaccurate demultiplexing. In the case of both negative control libraries, the coverage was orders or magnitude lower than that seen in the BLV positive libraries.





### **Sup Fig 5. Potential 3' ends of BLV antisense transcripts**

Ideogram of the BLV provirus, with 3'RACE reads for L267 mapping to the BLV genome shown below. Potential 3' ends of the BLV antisense transcripts are shown.

**(A)** Zoomed in IGV screen shot showing a large cluster of reads with poly A tails (shown as T in IGV) adjacent to the end of miR-B5-3p. No signal position predominates, although the bulk are found downstream (in the context of the AS transcript) of a canonical AAUAAA polyadenylation signal sequence (PAS). AS1 transcripts ending at this position were given the designation AS1-S.

**(B)** In five of the libraries subjected to 3'RACE a small number of poly A reads were observed at position ~5237. This is located 20bp downstream (in the context of the AS transcript) of a second canonical AAUAAA (PAS). Further, 3'RACE carried out on YR2 with the forward primer adjacent to this potential poly A site rather than the in AS1 exon 1 also showed polyadenylated products matching this position.

**(C)** For AS2, only L267 showed any evidence of a poly A tail, however no canonical PAS was observed and no consistent poly A site was observed. In the remaining samples (also observed in many L267 reads) the AS2 transcript underwent splicing with the host genome. Shown are the soft clipped bases (the bases in the read that did not map to BLV) for YR2 mapped to the ovine genome with BLAT (<http://genome.ucsc.edu/>). The bases correspond to an exon of the ELF2 transcript ~5kb upstream of the YR2 provirus integrated site.

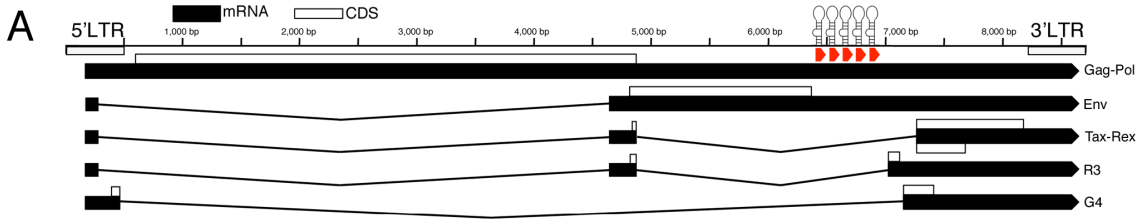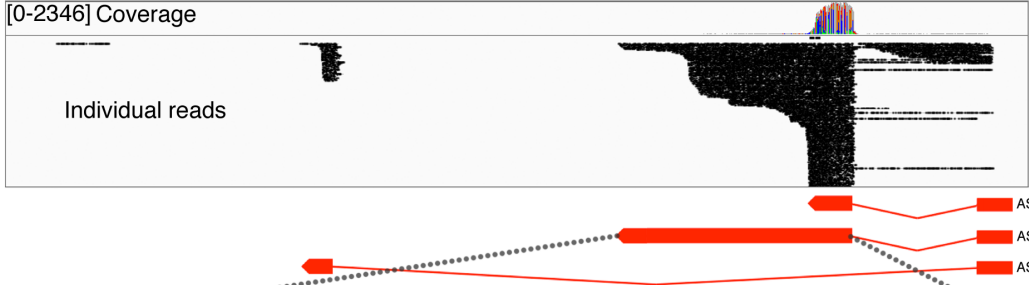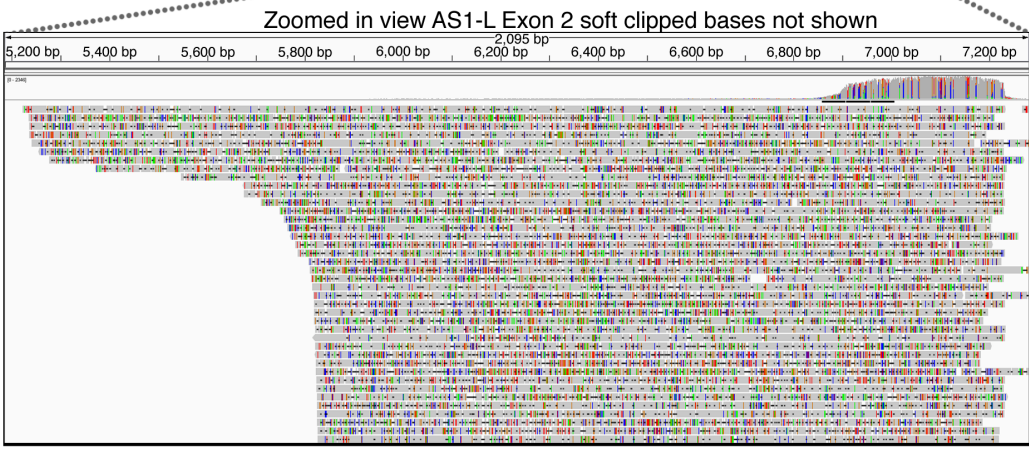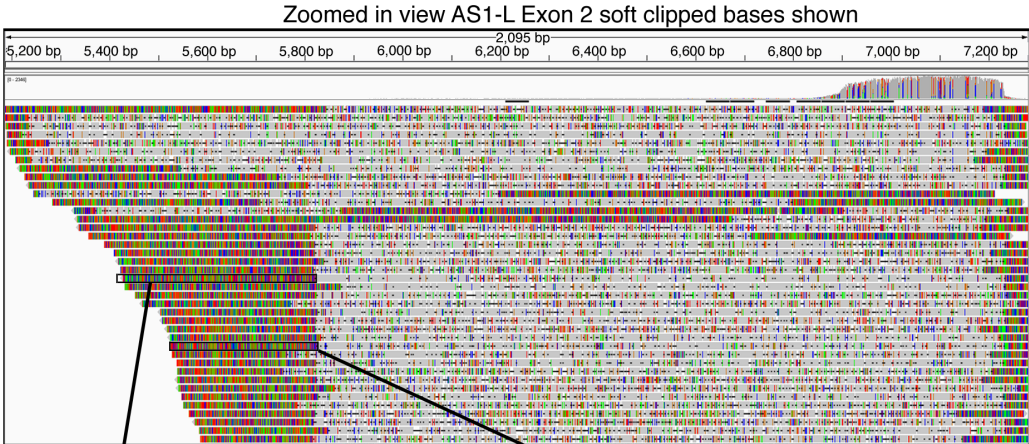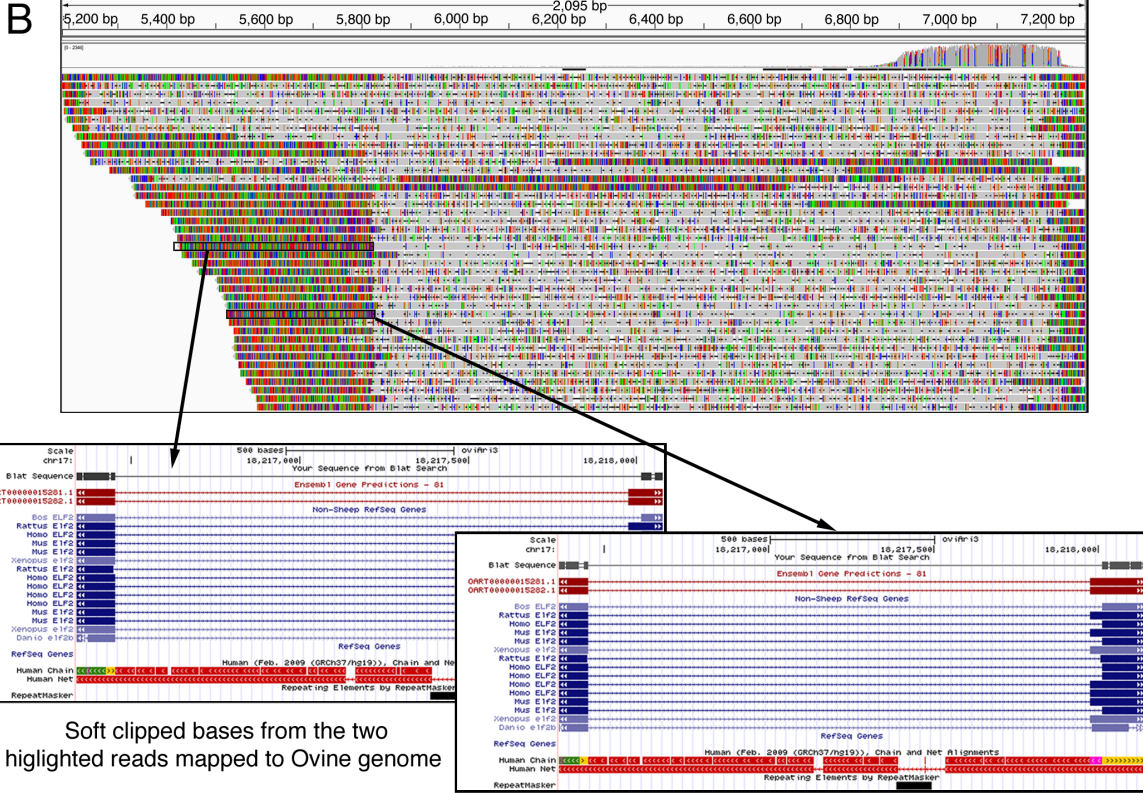

Soft clipped bases from the two highlighted reads mapped to Ovine genome

**Sup Fig 6. AS1-L 3'RACE long reads**

**(A)** Ideogram of the BLV provirus, with 3'RACE products from YR2 sequenced on a MinION (Oxford Nanopore Technologies) and mapping back to the BLV genome. Location of antisense transcripts is also shown. Like the case of the Illumina sequencing the majority of the reads take the form of the shorter AS1-S, some reads do extend to the postulated end of AS1-L at position ~5237. A number of long reads end before this position.

**(B)** Mapping of the soft clipped reads with BLAT (<http://genome.ucsc.edu/>) showed that many of these transcripts had undergone splicing with the ELF2 transcript. The large number of polymorphisms observed in the mapped reads are due to the high error rate observed in Nanopore reads.

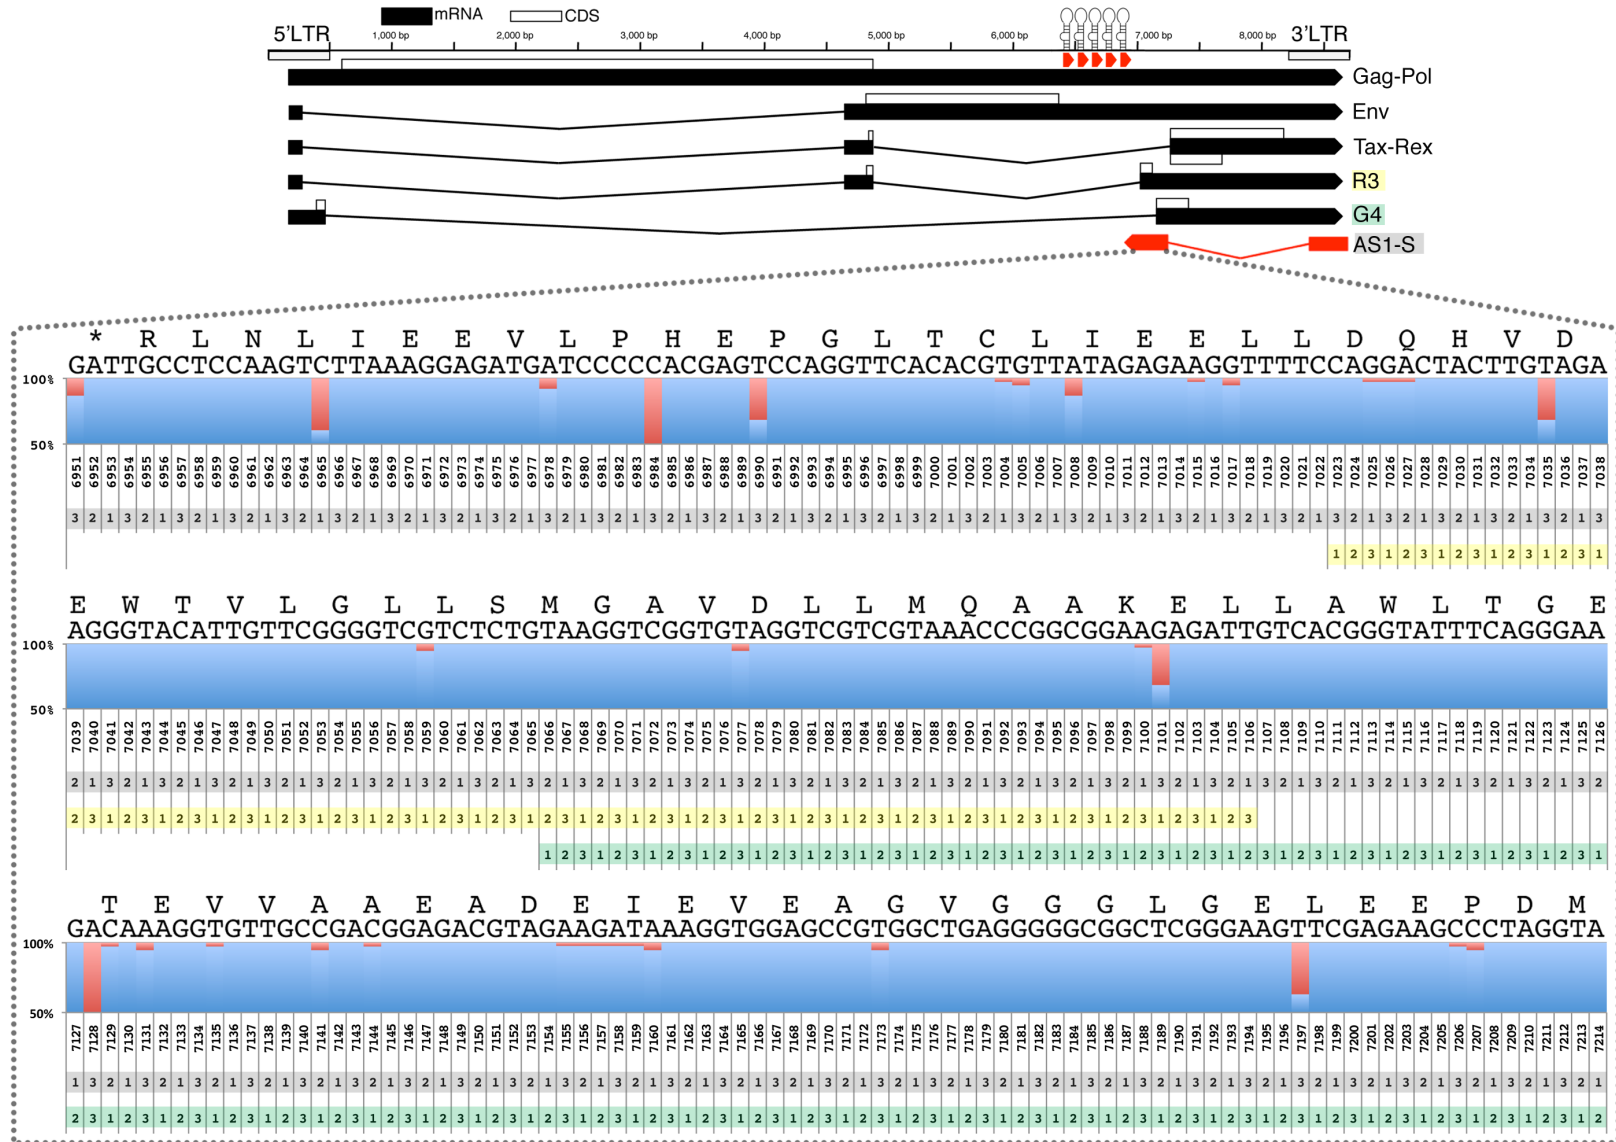

**Sup Fig 7. BLV AS1 potential open reading frame**

Potential amino acid sequence and the underlying nucleotide sequence. Shown below is the percentage conservation for each base calculated using the consensus sequence of the ovine and bovine tumours sequenced by us, as well as six BLV genomes available in NCBI. The amount of red at each position indicates the degree that a particular base varies in the samples examined. Below each base is indicated whether it corresponds to the 1<sup>st</sup>, 2<sup>nd</sup> or 3<sup>rd</sup> position of the relevant ORF. Shown ORFs include the potential AS1 ORF (grey), the sense R3 (yellow) and G4 (green) ORFs.

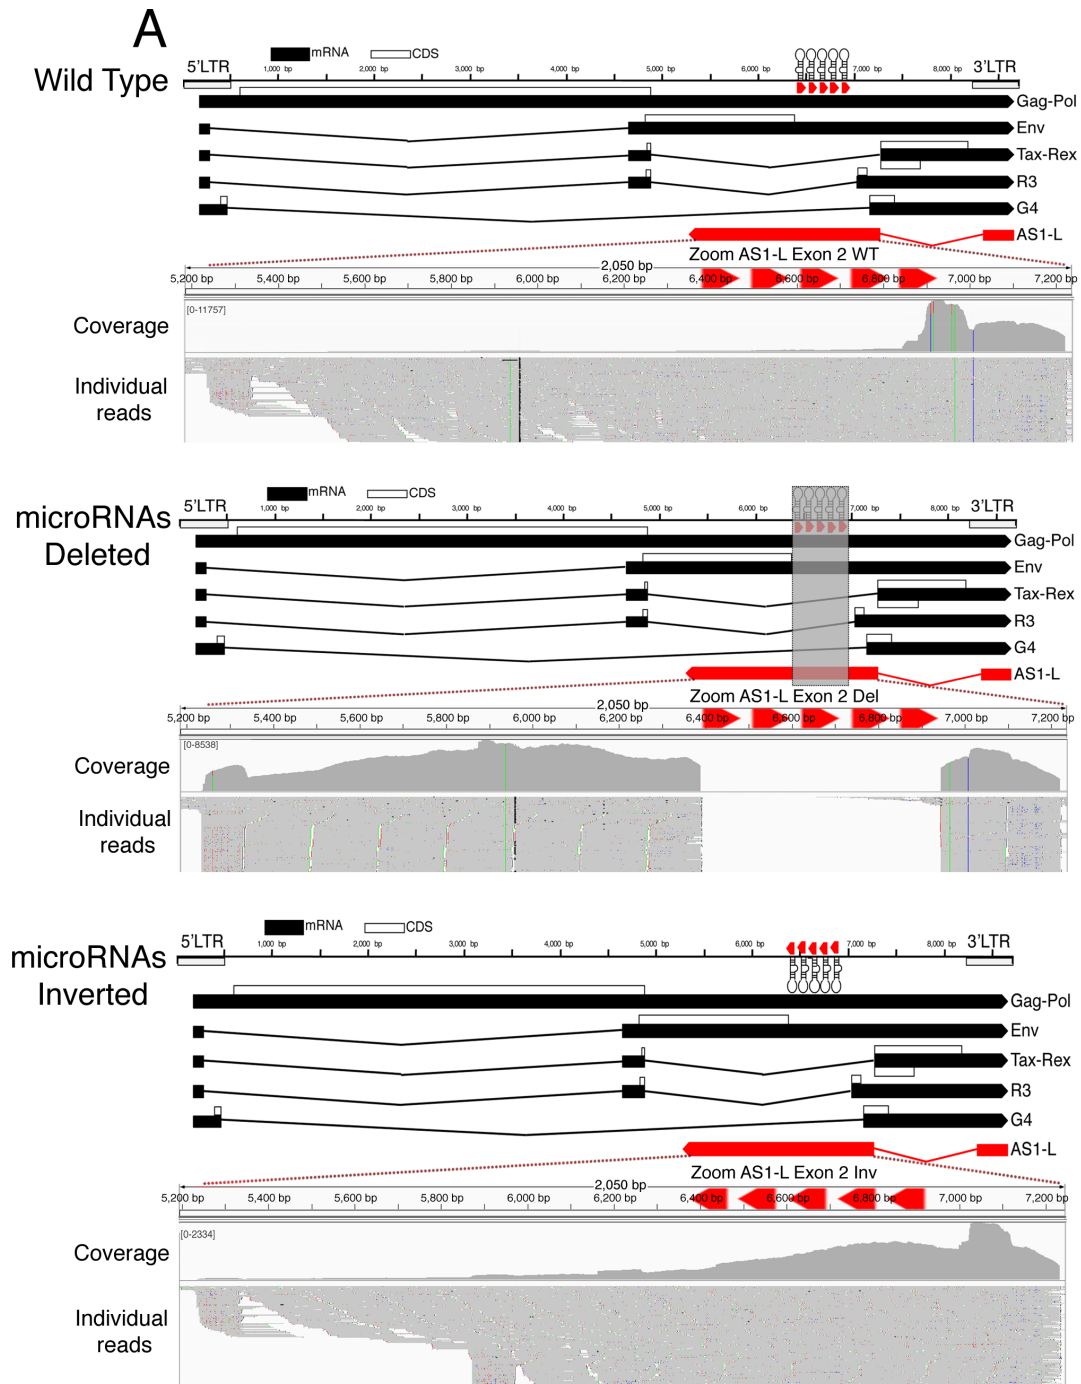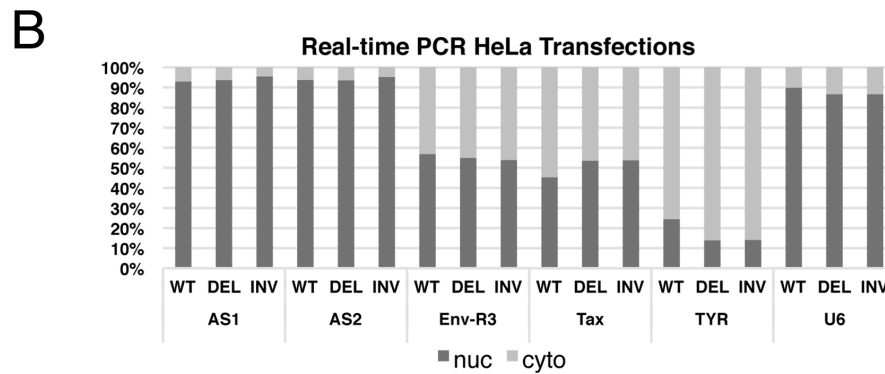



**Sup Fig 8. Effect of removal and inversion of BLV microRNAs**

**(A)** Ideograms showing the three proviruses used in transfections, the first a wild-type, the second where the microRNAs were deleted (grey box indicates the region removed), the third where the BLV microRNAs are inverted. 3'RACE on total RNA from HeLa cells transfected with the three constructs shows that the microRNA deletion/inversion increases the fraction of AS1-L reads. In the case of the wild type provirus and the microRNA deleted provirus, reads were mapped to the wild type provirus sequence. In the case of the microRNA inverted provirus, they are mapped to a proviral genome with microRNAs inverted to match the provirus used.

**(B)** Nuclear vs. cytoplasmic enrichment for BLV sense and antisense transcripts obtained via real-time RT-PCR with nuclear and cytoplasmic enriched RNA from HeLa cells transfected with either the wild type BLV pBLV344 provirus, the provirus with the BLV microRNAs removed or with the orientation of the BLV microRNAs inverted. Removing or inverting the BLV microRNAs had no apparent effect on the localisation of the sense or antisense transcripts. TYR = cytoplasmic enriched control, U6 = nuclear enriched control.

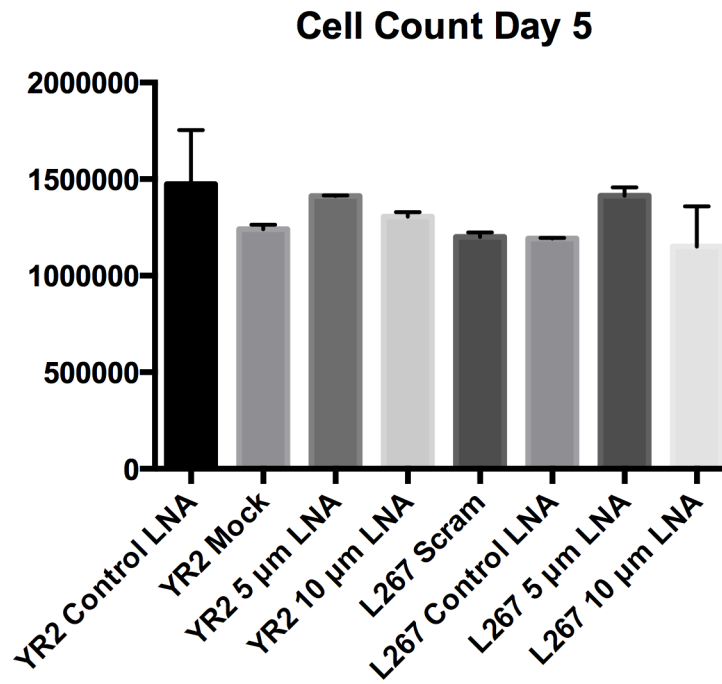

**Sup Fig 9. Locked nucleic acid AS knock down does not affect cell viability**

Following five days of incubation there was no obvious difference in the cell count among the different treatment conditions for both cell lines (numbers represent average, error bar shows maximum cell count).



**Table S1 Counts per million reads (CPM) for RNA sequencing**

| BLV cell lines | Antisense reads | Sense reads | Uniquely mapped reads | Antisense CPM | Sense CPM | AS CPM / S CPM |
|----------------|-----------------|-------------|-----------------------|---------------|-----------|----------------|
| L267           | 732             | 49          | 98989055              | 7.4           | 0.5       | 14.9           |
| YR2            | 526             | 9           | 54121243              | 9.7           | 0.2       | 58.4           |

| BLV cell lines Constitutive Tax expressing | Antisense reads | Sense reads* | Uniquely mapped reads | Antisense CPM | Sense CPM* | AS CPM / S CPM* |
|--------------------------------------------|-----------------|--------------|-----------------------|---------------|------------|-----------------|
| L267_TaxSN                                 | 149             | 40918        | 40848268              | 4             | 1002       | 0               |
| YR2_TaxSN                                  | 766             | 2126142      | 26093199              | 29            | 81483      | 0               |

\*As these cells have been transduced with a lentiviral vector containing the BLV Tax gene, the sense read count will be somewhat artificially elevated.

| Ovine Tumors | Antisense reads | Sense reads | Uniquely mapped reads | Antisense CPM | Sense CPM | AS CPM / S CPM |
|--------------|-----------------|-------------|-----------------------|---------------|-----------|----------------|
| M107         | 149             | 1           | 49133967              | 3             | 0         | 149            |
| M108         | 10176           | 96          | 89870131              | 113           | 1         | 106            |
| M126         | 416             | 0           | 54523313              | 8             | 0         | na             |
| M138         | 9734            | 113         | 78184059              | 125           | 1         | 86             |
| M155         | 4922            | 124         | 47933750              | 103           | 3         | 40             |
| M160         | 303             | 1           | 26665476              | 11            | 0         | 303            |
| M161         | 27              | 1           | 60630935              | 0             | 0         | 27             |
| M206         | 323             | 69          | 72283867              | 4             | 1         | 5              |
| M20PS        | 134             | 0           | 64457064              | 2             | 0         | na             |
| M210         | 531             | 152         | 98718132              | 5             | 2         | 3              |
| M21PS        | 261             | 0           | 88207690              | 3             | 0         | na             |
| M2233        | 10826           | 1894        | 98091530              | 110           | 19        | 6              |
| M2241        | 333             | 96          | 116416582             | 3             | 1         | 3              |
| M224         | 200             | 52          | 123827745             | 2             | 0         | 4              |
| M2311RM      | 51              | 1           | 18352207              | 3             | 0         | 51             |
| M251         | 476             | 2           | 57534668              | 8             | 0         | 238            |
| M2531T       | 77              | 23          | 22379496              | 3             | 1         | 3              |
| M2532PS      | 90              | 43          | 27152057              | 3             | 2         | 2              |
| M28PS        | 153             | 2           | 27420479              | 6             | 0         | 77             |
| M31Leu       | 134             | 49          | 44855981              | 3             | 1         | 3              |
| M32Leu       | 154             | 34          | 43549560              | 4             | 1         | 5              |
| M33Leu       | 80              | 177         | 27828214              | 3             | 6         | 0              |
| M344t0       | 113             | 6           | 26399373              | 4             | 0         | 19             |
| M360         | 95              | 11          | 31508541              | 3             | 0         | 9              |
| M395t0       | 118             | 14          | 25704049              | 5             | 1         | 8              |
| M41Leu       | 248             | 99          | 59025661              | 4             | 2         | 3              |
| M51          | 145             | 26          | 43602381              | 3             | 1         | 6              |
| M5578        | 154             | 1           | 56526611              | 3             | 0         | 154            |

| Bovine Tumors | Antisense reads | Sense reads | Uniquely mapped reads | Antisense CPM | Sense CPM | AS CPM / S CPM |
|---------------|-----------------|-------------|-----------------------|---------------|-----------|----------------|
| B167          | 466             | 104         | 58806726              | 7.9           | 1.8       | 4.5            |
| B169          | 372             | 13          | 45113265              | 8.2           | 0.3       | 28.6           |
| B3171         | 358             | 7           | 66728945              | 5.4           | 0.1       | 51.1           |
| B3191         | 736             | 14          | 66654840              | 11.0          | 0.2       | 52.6           |
| B3198         | 212             | 104         | 57163314              | 3.7           | 1.8       | 2.0            |
| B3261         | 270             | 315         | 27374722              | 9.9           | 11.5      | 0.9            |
| B70           | 27              | 0           | 45802524              | 0.6           | 0.0       | na             |
| B76SUS        | 84              | 1           | 81850287              | 1.0           | 0.0       | 84.0           |
| LB120         | 94              | 4           | 43108562              | 2.2           | 0.1       | 23.5           |
| T1345         | 171             | 60          | 37133243              | 4.6           | 1.6       | 2.9            |
| T15           | 171             | 60          | 37133243              | 4.6           | 1.6       | 2.9            |
| B1351         | 775             | 1222        | 147025250             | 5.3           | 8.3       | 0.6            |

| Bovine negative control | Antisense reads | Sense reads | Uniquely mapped reads | Antisense CPM | Sense CPM | AS CPM / S CPM |
|-------------------------|-----------------|-------------|-----------------------|---------------|-----------|----------------|
| B78t0                   | 0               | 0           | 64282590              | 0.0           | 0.0       | na             |

| Pre-leukemic ovine samples | Antisense reads | Sense reads | Uniquely mapped reads | Antisense CPM | Sense CPM | AS CPM / S CPM | Proviral Load | Number of clones |
|----------------------------|-----------------|-------------|-----------------------|---------------|-----------|----------------|---------------|------------------|
| #206                       | 31              | 5           | 50636602              | 0.6           | 0.1       | 6.2            | 5.3           | 1044             |
| #220                       | 32              | 14          | 39135557              | 0.8           | 0.4       | 2.3            | 6.4           | 810              |
| #221                       | 76              | 16          | 41934579              | 1.8           | 0.4       | 4.8            | 15.5          | 2118             |
| #222                       | 34              | 8           | 38819095              | 0.9           | 0.2       | 4.3            | 7.4           | 1522             |
| #232                       | 64              | 10          | 40063428              | 1.6           | 0.2       | 6.4            | 11.2          | 1368             |
| #235                       | 354             | 24          | 58371371              | 6.1           | 0.4       | 14.8           | 40.6          | 446              |

**BLV microRNA levels in three Pre-leukemic ovine samples**

|                     | #206  |          | #220   |          | #232   |          | Average CPM     |
|---------------------|-------|----------|--------|----------|--------|----------|-----------------|
|                     | Reads | CPM      | Reads  | CPM      | Reads  | CPM      |                 |
| <b>BLV-miR-1-3p</b> | 155   | 79.31    | 39998  | 2859.1   | 24854  | 1926.96  | <b>1621.79</b>  |
| <b>BLV-miR-1-5p</b> | 68    | 34.79    | 902    | 64.48    | 691    | 53.57    | <b>50.95</b>    |
| <b>BLV-miR-2-3p</b> | 31    | 15.86    | 10598  | 757.56   | 3834   | 297.25   | <b>356.89</b>   |
| <b>BLV-miR-2-5p</b> | 4544  | 2325.08  | 246282 | 17604.51 | 107735 | 8352.81  | <b>9427.47</b>  |
| <b>BLV-miR-3-3p</b> | 267   | 136.62   | 79434  | 5678.03  | 21722  | 1684.13  | <b>2499.59</b>  |
| <b>BLV-miR-3-5p</b> | 1148  | 587.41   | 9333   | 667.13   | 3680   | 285.31   | <b>513.28</b>   |
| <b>BLV-miR-4-3p</b> | 20887 | 10687.49 | 441945 | 31590.73 | 248436 | 19261.52 | <b>20513.25</b> |
| <b>BLV-miR-4-5p</b> | 595   | 304.45   | 9210   | 658.34   | 5739   | 444.95   | <b>469.25</b>   |
| <b>BLV-miR-5-3p</b> | 3848  | 1968.95  | 51727  | 3697.5   | 17401  | 1349.12  | <b>2338.52</b>  |
| <b>BLV-miR-5-5p</b> | 15422 | 7891.15  | 220195 | 15739.79 | 91538  | 7097.04  | <b>10242.66</b> |

**Table S2 5'RACE**

| <b>Start position</b> | <b>AS1 %</b> | <b>AS2 %</b> |
|-----------------------|--------------|--------------|
| <b>8661</b>           | <u>3.33</u>  | <u>0.00</u>  |
| <b>8659</b>           | <u>1.13</u>  | <u>0.00</u>  |
| <b>8657</b>           | <u>1.53</u>  | <u>0.00</u>  |
| <b>8656</b>           | <u>0.51</u>  | <u>1.80</u>  |
| <b>8655</b>           | <u>1.42</u>  | <u>0.74</u>  |
| <b>8653</b>           | <u>0.00</u>  | <u>2.21</u>  |
| <b>8650</b>           | <u>42.26</u> | <u>45.88</u> |
| <b>8649</b>           | <u>3.29</u>  | <u>4.36</u>  |
| <b>8645</b>           | <u>1.95</u>  | <u>0.00</u>  |
| <b>8640</b>           | <u>0.00</u>  | <u>2.39</u>  |
| <b>8638</b>           | <u>0.62</u>  | <u>0.00</u>  |
| <b>8626</b>           | <u>0.64</u>  | <u>0.00</u>  |
| <b>8622</b>           | <u>0.01</u>  | <u>2.03</u>  |
| <b>8621</b>           | <u>0.67</u>  | <u>0.00</u>  |
| <b>8614</b>           | <u>0.52</u>  | <u>0.00</u>  |
| <b>8598</b>           | <u>2.23</u>  | <u>0.00</u>  |
| <b>8593</b>           | <u>0.90</u>  | <u>5.98</u>  |
| <b>8591</b>           | <u>27.35</u> | <u>20.76</u> |
| <b>8590</b>           | <u>3.68</u>  | <u>0.00</u>  |
| <b>8588</b>           | <u>3.69</u>  | <u>3.65</u>  |
| <b>8586</b>           | <u>2.58</u>  | <u>5.98</u>  |
| <b>8578</b>           | <u>0.88</u>  | <u>4.24</u>  |
| <b>8563</b>           | <u>0.80</u>  | <u>0.00</u>  |

Underlined in the U5 portion of the LTR

Non Underlined in the R portion of the LTR

**Table S3 Output of Coding Potential Assessment Tool (CPAT) for Human and Mouse models.**

| Sequence Name | RNA size | ORF size | Fickett Score Human | Hexamer Score Human | Coding Probability Human | Coding Label Human | Fickett Score Mouse | Hexamer Score mouse | Coding Probability Mouse | Coding Label Mouse | Full description                                                                                      |
|---------------|----------|----------|---------------------|---------------------|--------------------------|--------------------|---------------------|---------------------|--------------------------|--------------------|-------------------------------------------------------------------------------------------------------|
| BLV_ENV_CDS   | 1548     | 1548     | 0.4913              | 0.0524733           | 1.000                    | yes                | 0.4913              | 0.054735            | 0.999                    | yes                | AY078387.1 Bovine leukemia virus envelope glycoprotein polyprotein precursor gPr72 mRNA, complete cds |
| BLV_TAX_CDS   | 1323     | 930      | 0.7419              | 0.07244925          | 0.991                    | yes                | 0.7419              | 0.061266            | 0.955                    | yes                | M26772.1 BLVTAP Bovine leukemia virus transactivator protein (XBL-1) mRNA, complete cds               |
| AS1-L_BLV     | 2279     | 264      | 1.2074              | 0.20939568          | 0.449                    | yes                | 1.2074              | 0.18289             | 0.386                    | no                 | YR2 Region included: 5237-7217 & 8353-8650                                                            |
| AS1-S_BLV     | 621      | 264      | 1.2074              | 0.20939568          | 0.474                    | yes                | 1.2074              | 0.18289             | 0.393                    | no                 | YR2 Region included: 6895-7217 & 8353-8650                                                            |
| AS2_BLV       | 475      | 24       | 0.6636              | -0.0202475          | 0.003                    | no                 | 0.6636              | 0.043919            | 0.022                    | no                 | YR2 Region included: 2653-2829 & 8353-8650                                                            |
| HTLV1_TAX_CDS | 1062     | 1062     | 0.6939              | 0.09265053          | 0.998                    | yes                | 0.6939              | 0.0917              | 0.983                    | yes                | AB038239.1 Human T-cell lymphotropic virus type 1 proviral gene for TAX, complete cds                 |
| HBZ-SI        | 1088     | 621      | 0.9541              | 0.3919547           | 0.984                    | yes                | 0.9541              | 0.388948            | 0.919                    | yes                | AB219938.1 Human T-lymphotropic virus 1 HBZ-SI mRNA for bZIP factor splicing isoform, complete cds    |
| HBZ           | 2271     | 621      | 0.9541              | 0.39313014          | 0.983                    | yes                | 0.9541              | 0.39132             | 0.918                    | yes                | DQ273132.1 Human T-lymphotropic virus 1 bZIP factor (HBZ) mRNA, complete cds                          |
| URS0000627204 | 126      | 75       | 0.8738              | 0.05856478          | 0.015                    | no                 | 0.8738              | 0.106084            | 0.060                    | no                 | Bos taurus FMR1 antisense RNA 1 conserved region 2                                                    |
| URS0000629A5A | 74       | 39       | 0.814               | 0.27273758          | 0.035                    | no                 | 0.814               | 0.26024             | 0.071                    | no                 | Bos taurus ST7 overlapping transcript 3 conserved region 1                                            |
| URS000062C20C | 267      | 54       | 0.702               | -0.4533927          | 0.000                    | no                 | 0.702               | -0.40761            | 0.006                    | no                 | Bos taurus Rhabdomyosarcoma 2 associated transcript conserved region 7                                |
| URS000062D38D | 173      | 96       | 0.8215              | -0.1728042          | 0.004                    | no                 | 0.8215              | -0.20799            | 0.021                    | no                 | Bos taurus SMAD5 antisense RNA 1 conserved region 4                                                   |
| URS000062E2FC | 184      | 42       | 1.0161              | 0.39283106          | 0.134                    | no                 | 1.0161              | 0.391101            | 0.159                    | no                 | Bos taurus Pvt1 oncogene conserved region 2                                                           |
| URS00006358D2 | 122      | 0        | 0                   | 0                   | 0.000                    | no                 | 0                   | 0                   | 0.004                    | no                 | Bos taurus WT1 antisense RNA conserved region 6                                                       |
| URS000063C6A6 | 69       | 60       | 1.2062              | 0.31121489          | 0.167                    | no                 | 1.2062              | 0.294404            | 0.181                    | no                 | Bos taurus HOTAIR conserved region 2                                                                  |
| URS000063F560 | 75       | 66       | 1.0881              | 0.31642329          | 0.132                    | no                 | 1.0881              | 0.320309            | 0.167                    | no                 | Bos taurus Six3os1 conserved region 3                                                                 |
| URS0000646539 | 135      | 21       | 0.8415              | -0.4974953          | 0.000                    | no                 | 0.8415              | -0.48419            | 0.005                    | no                 | Bos taurus TTC28 antisense RNA 1 conserved region 2                                                   |
| URS000064CDD2 | 76       | 12       | 0.6466              | -1.2066197          | 0.000                    | no                 | 0.6466              | -1.21027            | 0.000                    | no                 | Bos taurus Ghrelin opposite strand RNA conserved region                                               |
| URS000064D724 | 91       | 0        | 0                   | 0                   | 0.000                    | no                 | 0                   | 0                   | 0.004                    | no                 | Bos taurus SPRY4-IT1 conserved region 1                                                               |
| URS00006510A8 | 128      | 0        | 0                   | 0                   | 0.000                    | no                 | 0                   | 0                   | 0.004                    | no                 | Bos taurus HOX antisense intergenic RNA myeloid 1 conserved region 1                                  |
| URS0000654C49 | 128      | 108      | 1.0217              | -0.1023593          | 0.012                    | no                 | 1.0217              | -0.12115            | 0.045                    | no                 | Bos taurus ZEB2 antisense RNA 1 conserved region 1                                                    |
| URS0000656B63 | 196      | 66       | 0.9235              | -0.4407478          | 0.001                    | no                 | 0.9235              | -0.50966            | 0.007                    | no                 | Bos taurus DLG2 antisense RNA 1 conserved region 1                                                    |
| URS000065971F | 198      | 132      | 1.0106              | 0.38695776          | 0.279                    | no                 | 1.0106              | 0.413437            | 0.281                    | no                 | Bos taurus FTX transcript, XIST regulator conserved region 5                                          |
| URS000065978A | 129      | 6        | 0.3621              | 0.5274011           | 0.032                    | no                 | 0.3621              | 0.478289            | 0.052                    | no                 | Bos taurus Rhabdomyosarcoma 2 associated transcript conserved region 5                                |
| URS00006599B8 | 410      | 63       | 0.463               | -0.2440055          | 0.001                    | no                 | 0.463               | -0.22584            | 0.008                    | no                 | Bos taurus Prostate cancer antigen RNA 3 conserved region 2                                           |
| URS000067674B | 226      | 54       | 0.9351              | -0.209365           | 0.003                    | no                 | 0.9351              | -0.24973            | 0.016                    | no                 | Bos taurus KCNQ1 overlapping transcript 1 conserved region 5                                          |
| URS0000677082 | 362      | 192      | 0.6974              | 0.06993743          | 0.033                    | no                 | 0.6974              | 0.086216            | 0.090                    | no                 | Bos taurus HOXA transcript at the distal tip, conserved region 3                                      |
| URS0000677825 | 110      | 0        | 0                   | 0                   | 0.000                    | no                 | 0                   | 0                   | 0.004                    | no                 | Bos taurus WT1 antisense RNA conserved region 1                                                       |
| URS00006791CF | 71       | 24       | 0.8356              | -0.2796512          | 0.001                    | no                 | 0.8356              | -0.26156            | 0.011                    | no                 | Bos taurus FTX transcript, XIST regulator conserved region 1                                          |
| URS000067BA49 | 69       | 27       | 0.7868              | -0.0096499          | 0.004                    | no                 | 0.7868              | 0.012107            | 0.026                    | no                 | Bos taurus SOX2 overlapping transcript exon 2                                                         |
| URS000067BA92 | 143      | 9        | 0.3728              | -1.3586378          | 0.000                    | no                 | 0.3728              | -1.36827            | 0.000                    | no                 | Bos taurus HOX antisense intergenic RNA myeloid 1 conserved region 5                                  |
| URS000067C9B9 | 110      | 0        | 0                   | 0                   | 0.000                    | no                 | 0                   | 0                   | 0.004                    | no                 | Bos taurus SOX2 overlapping transcript exon 4                                                         |
| URS000067F6F2 | 95       | 36       | 0.7352              | -0.4349202          | 0.000                    | no                 | 0.7352              | -0.48489            | 0.004                    | no                 | Bos taurus Pvt1 oncogene conserved region 3                                                           |
| URS00006863C9 | 465      | 132      | 0.6392              | -0.1553791          | 0.003                    | no                 | 0.6392              | -0.16905            | 0.022                    | no                 | Bos taurus KCNQ1 overlapping transcript 1 conserved region 1                                          |
| URS0000692A75 | 272      | 75       | 1.0068              | -0.3422251          | 0.002                    | no                 | 1.0068              | -0.35497            | 0.015                    | no                 | Bos taurus ST7 overlapping transcript 4 conserved region 3                                            |

|               |     |     |        |            |       |    |        |          |       |    |                                                                             |
|---------------|-----|-----|--------|------------|-------|----|--------|----------|-------|----|-----------------------------------------------------------------------------|
| URS00006940C3 | 350 | 48  | 1.0193 | 0.22573242 | 0.052 | no | 1.0193 | 0.219188 | 0.095 | no | Bos taurus Six3os1 conserved region 4                                       |
| URS0000696811 | 244 | 75  | 0.8859 | -0.1532851 | 0.004 | no | 0.8859 | -0.1798  | 0.022 | no | Bos taurus MEST intronic transcript 1, antisense RNA conserved region       |
| URS000069B56D | 77  | 0   | 0      | 0          | 0.000 | no | 0      | 0        | 0.004 | no | Bos taurus MER1 repeat containing imprinted transcript 1 conserved region 1 |
| URS00006B0AAD | 142 | 126 | 0.5035 | -0.1773767 | 0.002 | no | 0.5035 | -0.22026 | 0.013 | no | Bos taurus Embryonic ventral forebrain-2 long ncRNA                         |
| URS00006B3397 | 139 | 0   | 0      | 0          | 0.000 | no | 0      | 0        | 0.004 | no | Bos taurus T-cell leukemia/lymphoma 6 conserved region 3                    |
| URS00006B4586 | 96  | 57  | 0.8308 | -0.0128911 | 0.007 | no | 0.8308 | -0.00722 | 0.033 | no | Bos taurus FTX transcript, XIST regulator conserved region 2                |
| URS00006B4E0E | 85  | 0   | 0      | 0          | 0.000 | no | 0      | 0        | 0.004 | no | Bos taurus X-chromosome inactivation gene exon 1                            |
| URS00006B5CAE | 87  | 84  | 0.9455 | -0.0385016 | 0.011 | no | 0.9455 | -0.00353 | 0.050 | no | Bos taurus Six3os1 conserved region 1                                       |
| URS00006BA2BF | 113 | 45  | 1.2098 | -0.5166496 | 0.001 | no | 1.2098 | -0.47865 | 0.012 | no | Bos taurus FAM13A antisense RNA 1 conserved region 2                        |
| URS00006BE61D | 90  | 42  | 0.7436 | -0.1707097 | 0.002 | no | 0.7436 | -0.25714 | 0.010 | no | Bos taurus Deleted in lymphocytic leukemia 2 conserved region 2             |
| URS00006C4A69 | 55  | 24  | 0.9172 | -0.5042849 | 0.000 | no | 0.9172 | -0.53981 | 0.004 | no | Bos taurus Deleted in lymphocytic leukemia 2 conserved region 4             |
| URS00006C6BE4 | 97  | 15  | 0.3752 | -0.5360566 | 0.000 | no | 0.3752 | -0.64961 | 0.001 | no | Bos taurus Maternally expressed 8 exon 1                                    |
| URS00006CA376 | 106 | 48  | 1.2192 | 0.05717137 | 0.033 | no | 1.2192 | 0.020792 | 0.071 | no | Bos taurus Rhabdomyosarcoma 2 associated transcript conserved region 4      |
| URS00006CB17F | 70  | 6   | 0.4615 | 0.5002443  | 0.036 | no | 0.4615 | 0.45189  | 0.057 | no | Bos taurus H19 conserved region 1                                           |
| URS00006CC536 | 168 | 9   | 0.876  | -1.8762211 | 0.000 | no | 0.876  | -1.53144 | 0.000 | no | Bos taurus FAS antisense RNA 1 conserved region                             |
| URS00006CDA32 | 281 | 30  | 0.4802 | -0.1819694 | 0.001 | no | 0.4802 | -0.22201 | 0.006 | no | Bos taurus Highly up-regulated in liver cancer conserved region             |
| URS00006CF3EB | 105 | 9   | 0.6632 | -0.9039742 | 0.000 | no | 0.6632 | -0.98346 | 0.000 | no | Bos taurus Maternally expressed 3 conserved region 2                        |
| URS00006D1977 | 127 | 0   | 0      | 0          | 0.000 | no | 0      | 0        | 0.004 | no | Bos taurus Nuclear enriched abundant transcript 1 conserved region 2        |
| URS00006D2BA2 | 108 | 0   | 0      | 0          | 0.000 | no | 0      | 0        | 0.004 | no | Bos taurus Maternally expressed 8 exon 2                                    |
| URS00006D5400 | 231 | 69  | 0.9188 | -0.4056706 | 0.001 | no | 0.9188 | -0.43784 | 0.009 | no | Bos taurus HOXA11 antisense RNA 1 conserved region 4                        |
| URS00006D9004 | 237 | 9   | 0.6218 | -1.8230951 | 0.000 | no | 0.6218 | -1.55709 | 0.000 | no | Bos taurus Hydatidiform mole associated and imprinted conserved region      |
| URS00006DB21C | 229 | 57  | 0.9927 | -0.1059787 | 0.006 | no | 0.9927 | -0.10886 | 0.031 | no | Bos taurus SOX2 overlapping transcript exon 1                               |
| URS00006DD07E | 129 | 114 | 1.0023 | -0.0866744 | 0.013 | no | 1.0023 | -0.08125 | 0.052 | no | Bos taurus SMAD5 antisense RNA 1 conserved region 2                         |
| URS00006DEB8C | 288 | 57  | 1.1384 | -0.2507425 | 0.004 | no | 1.1384 | -0.14768 | 0.036 | no | Bos taurus WT1 antisense RNA conserved region 7                             |
| URS00006E1889 | 103 | 39  | 0.9909 | 0.21341658 | 0.041 | no | 0.9909 | 0.264031 | 0.099 | no | Bos taurus T-cell leukemia/lymphoma 6 conserved region 1                    |
| URS00006E497F | 91  | 87  | 0.6421 | 0.08119545 | 0.010 | no | 0.6421 | 0.064335 | 0.037 | no | Bos taurus ZNFX1 antisense RNA 1 conserved region 2                         |
| URS00006E59D7 | 144 | 72  | 0.9981 | -0.1669965 | 0.005 | no | 0.9981 | -0.14338 | 0.031 | no | Bos taurus Taurine upregulated gene 1 conserved region 1                    |
| URS00006EA6C7 | 180 | 0   | 0      | 0          | 0.000 | no | 0      | 0        | 0.004 | no | Bos taurus Embryonic ventral forebrain RNA 1 conserved region 1             |
| URS00006EA80E | 115 | 0   | 0      | 0          | 0.000 | no | 0      | 0        | 0.004 | no | Bos taurus FAM13A antisense RNA 1 conserved region 1                        |
| URS00006EEA29 | 135 | 42  | 1.0223 | -0.1295657 | 0.005 | no | 1.0223 | -0.09857 | 0.031 | no | Bos taurus Myocardial infarction associated transcript exon 1               |
| URS00006F4484 | 68  | 0   | 0      | 0          | 0.000 | no | 0      | 0        | 0.004 | no | Bos taurus Maternally expressed 8 exon 3                                    |
| URS00006F60BE | 92  | 78  | 1.1896 | -0.0083285 | 0.027 | no | 1.1896 | 0.019669 | 0.082 | no | Bos taurus ZNFX1 antisense RNA 1 conserved region 2                         |
| URS00006F7F53 | 154 | 48  | 1.1266 | -0.0075192 | 0.016 | no | 1.1266 | 0.045069 | 0.065 | no | Bos taurus NPPA antisense RNA 1 conserved region 2                          |
| URS00006FE4FF | 171 | 75  | 0.779  | -0.3315217 | 0.001 | no | 0.779  | -0.36448 | 0.009 | no | Bos taurus ST7 overlapping transcript 4 conserved region 2                  |
| URS00006FF6E6 | 143 | 99  | 0.8323 | 0.11958267 | 0.026 | no | 0.8323 | 0.150557 | 0.076 | no | Bos taurus Rhabdomyosarcoma 2 associated transcript conserved region 8      |
| URS00006FFF5E | 262 | 114 | 1.014  | 0.05805101 | 0.035 | no | 1.014  | 0.042241 | 0.081 | no | Bos taurus SMAD5 antisense RNA 1 conserved region 1                         |
| URS00007035F2 | 132 | 18  | 0.408  | -0.0844732 | 0.001 | no | 0.408  | -0.18755 | 0.006 | no | Bos taurus Pvt1 oncogene conserved region 5                                 |
| URS00007036C6 | 141 | 57  | 0.6862 | 0.02145747 | 0.006 | no | 0.6862 | 0.067528 | 0.033 | no | Bos taurus Rhabdomyosarcoma 2 associated transcript conserved region 2      |
| URS0000708ABD | 586 | 120 | 0.8006 | 0.07255146 | 0.021 | no | 0.8006 | 0.115562 | 0.073 | no | Bos taurus Vax2os1 conserved region 2                                       |
| URS0000717AE7 | 102 | 0   | 0      | 0          | 0.000 | no | 0      | 0        | 0.004 | no | Bos taurus ZEB2 antisense RNA 1 conserved region 3                          |

|               |      |     |        |            |       |     |        |          |       |     |                                                                                                                       |
|---------------|------|-----|--------|------------|-------|-----|--------|----------|-------|-----|-----------------------------------------------------------------------------------------------------------------------|
| URS0000717FE0 | 101  | 0   | 0      | 0          | 0.000 | no  | 0      | 0        | 0.004 | no  | Bos taurus ZEB2 antisense RNA 1 conserved region 3                                                                    |
| URS0000719B0F | 77   | 48  | 1.1266 | -0.0075192 | 0.016 | no  | 1.1266 | 0.045069 | 0.065 | no  | Bos taurus NPPA antisense RNA 1 conserved region 2                                                                    |
| URS00007259BA | 104  | 75  | 1.0494 | -0.2156819 | 0.004 | no  | 1.0494 | -0.21204 | 0.027 | no  | Bos taurus Metastasis associated lung adenocarcinoma transcript 1                                                     |
| URS0000726CC0 | 118  | 12  | 1.0582 | -0.380929  | 0.001 | no  | 1.0582 | -0.48892 | 0.007 | no  | Bos taurus GNAS antisense RNA 1 conserved region 2                                                                    |
| URS000072850B | 247  | 45  | 1.1273 | -0.2826858 | 0.003 | no  | 1.1273 | -0.28376 | 0.020 | no  | Bos taurus Prostate androgen-regulated transcript 1 conserved region 2                                                |
| URS000072AE6B | 54   | 27  | 0.867  | -0.7723672 | 0.000 | no  | 0.867  | -0.8099  | 0.002 | no  | Bos taurus FMR1 antisense RNA 1 conserved region 1                                                                    |
| URS000072B940 | 215  | 192 | 1.0975 | 0.05917406 | 0.100 | no  | 1.0975 | 0.060013 | 0.165 | no  | Bos taurus DLG2 antisense RNA 1 conserved region 2                                                                    |
| URS000072CEB9 | 330  | 141 | 0.9852 | -0.0307435 | 0.024 | no  | 0.9852 | -0.01007 | 0.078 | no  | Bos taurus Deleted in lymphocytic leukemia 1 conserved region 2                                                       |
| URS0000759C73 | 2069 | 345 | 0.5704 | 0.12308877 | 0.132 | no  | 0.5704 | 0.166592 | 0.234 | no  | Bos taurus H19, imprinted maternally expressed transcript (non-protein coding) (H19), long non-coding RNA.            |
| URS0000759E04 | 539  | 348 | 1.0681 | 0.42958035 | 0.861 | yes | 1.0681 | 0.408492 | 0.675 | yes | Bos taurus artiodactyl-specific transcript 1 (AST1), long non-coding RNA.                                             |
| URS000075A1EC | 978  | 177 | 0.9069 | 0.16822608 | 0.093 | no  | 0.9069 | 0.171259 | 0.153 | no  | Bos taurus uncharacterized LOC100196901 (LOC100196901), transcript variant 1, long non-coding RNA.                    |
| URS000075A42C | 801  | 282 | 0.6385 | -0.0187509 | 0.039 | no  | 0.6385 | 0.026889 | 0.119 | no  | Bos taurus uncharacterized LOC100847825 (LOC100847825), long non-coding RNA.                                          |
| URS000075B4CA | 1135 | 180 | 0.6608 | -0.0817498 | 0.009 | no  | 0.6608 | -0.08575 | 0.042 | no  | Bos taurus chromosome 23 open reading frame, human C6orf52 (C23H6orf52), transcript variant 1, long non-coding RNA.   |
| URS000075B604 | 1008 | 228 | 0.3596 | -0.2278236 | 0.002 | no  | 0.3596 | -0.26194 | 0.018 | no  | Bos taurus uncharacterized LOC100847946 (LOC100847946), long non-coding RNA.                                          |
| URS000075B9FD | 955  | 144 | 0.6445 | -0.1496252 | 0.004 | no  | 0.6445 | -0.17596 | 0.023 | no  | Bos taurus uncharacterized LOC100848574 (LOC100848574), transcript variant 6, long non-coding RNA.                    |
| URS000075BC30 | 1638 | 381 | 0.7    | 0.06400548 | 0.189 | no  | 0.7    | 0.097322 | 0.286 | no  | Bos taurus uncharacterized LOC100140121 (LOC100140121), long non-coding RNA.                                          |
| URS000075C0CE | 1954 | 555 | 0.7853 | 0.19222819 | 0.821 | yes | 0.7853 | 0.22794  | 0.731 | yes | Bos taurus maternally expressed 3 (non-protein coding) (MEG3), long non-coding RNA.                                   |
| URS000075C544 | 806  | 180 | 0.6608 | -0.0817498 | 0.009 | no  | 0.6608 | -0.08575 | 0.042 | no  | Bos taurus chromosome 23 open reading frame, human C6orf52 (C23H6orf52), transcript variant 3, long non-coding RNA.   |
| URS000075CDC9 | 446  | 78  | 0.8326 | -0.1762391 | 0.003 | no  | 0.8326 | -0.21904 | 0.018 | no  | Bos taurus small nucleolar RNA host gene 4 (non-protein coding) (SNHG4), long non-coding RNA.                         |
| URS000075CF6E | 888  | 165 | 0.6564 | -0.1177284 | 0.006 | no  | 0.6564 | -0.14663 | 0.030 | no  | Bos taurus uncharacterized LOC788201 (LOC788201), long non-coding RNA.                                                |
| URS000075D01A | 1078 | 372 | 0.5896 | 0.07532513 | 0.143 | no  | 0.5896 | 0.099628 | 0.235 | no  | Bos taurus small nucleolar RNA host gene 12 (non-protein coding) (SNHG12), transcript variant 2, long non-coding RNA. |
| URS000075D08D | 546  | 144 | 0.8749 | 0.07291865 | 0.034 | no  | 0.8749 | 0.058342 | 0.081 | no  | Bos taurus uncharacterized LOC100616526 (LOC100616526), transcript variant 3, long non-coding RNA.                    |
| URS000075D922 | 911  | 144 | 0.6445 | -0.1496252 | 0.004 | no  | 0.6445 | -0.17596 | 0.023 | no  | Bos taurus uncharacterized LOC100848574 (LOC100848574), transcript variant 4, long non-coding RNA.                    |
| URS000075DA73 | 3345 | 186 | 0.6977 | 0.2334901  | 0.072 | no  | 0.6977 | 0.296428 | 0.162 | no  | Bos taurus uncharacterized LOC782788 (MGC148318), long non-coding RNA.                                                |
| URS000075DAE4 | 413  | 168 | 0.9531 | 0.16216371 | 0.096 | no  | 0.9531 | 0.159035 | 0.151 | no  | Bos taurus uncharacterized LOC100616098 (LOC100616098), long non-coding RNA.                                          |
| URS000075DCA1 | 3462 | 342 | 0.7099 | 0.08846014 | 0.142 | no  | 0.7099 | 0.070938 | 0.213 | no  | Bos taurus uncharacterized LOC100616526 (LOC100616526), transcript variant 1, long non-coding RNA.                    |

|               |      |      |        |            |       |     |        |          |       |     |                                                                                                                       |
|---------------|------|------|--------|------------|-------|-----|--------|----------|-------|-----|-----------------------------------------------------------------------------------------------------------------------|
| URS000075E3D6 | 3025 | 1380 | 0.9853 | 0.32875034 | 1.000 | yes | 0.9853 | 0.32318  | 1.000 | yes | Bos taurus PPARG-TSEN2 (PPARG-TSEN2), transcript variant 1, long non-coding RNA.                                      |
| URS000075EAE1 | 1030 | 180  | 0.6608 | -0.0817498 | 0.009 | no  | 0.6608 | -0.08575 | 0.042 | no  | Bos taurus chromosome 23 open reading frame, human C6orf52 (C23H6orf52), transcript variant 2, long non-coding RNA.   |
| URS000075EB28 | 1123 | 372  | 0.5896 | 0.07532513 | 0.143 | no  | 0.5896 | 0.099628 | 0.235 | no  | Bos taurus small nucleolar RNA host gene 12 (non-protein coding) (SNHG12), transcript variant 1, long non-coding RNA. |
| URS000075EC71 | 1875 | 1107 | 0.9629 | 0.40041855 | 1.000 | yes | 0.9629 | 0.410277 | 0.998 | yes | Bos taurus LOC100271850-MEF2B readthrough transcript (LOC100271850-MEF2B), long non-coding RNA.                       |
| URS000075EDB2 | 1014 | 147  | 0.894  | 0.0876376  | 0.040 | no  | 0.894  | 0.048664 | 0.082 | no  | Bos taurus uncharacterized LOC100848574 (LOC100848574), transcript variant 2, long non-coding RNA.                    |
| URS0000623174 | 121  | 72   | 1.0222 | 0.23927818 | 0.073 | no  | 1.0222 | 0.241506 | 0.121 | no  | Bos taurus Nuclear enriched abundant transcript 1 conserved region 1                                                  |
| URS0000625647 | 155  | 42   | 0.6501 | -0.1411949 | 0.001 | no  | 0.6501 | -0.13515 | 0.013 | no  | Bos taurus Pregnancy induced noncoding RNA                                                                            |
| URS0000627F0B | 157  | 45   | 0.8968 | -0.0799771 | 0.005 | no  | 0.8968 | -0.12273 | 0.023 | no  | Bos taurus TP53 target 1 conserved region 1                                                                           |
| URS0000627F39 | 113  | 6    | 0.3299 | -2.901853  | 0.000 | no  | 0.3299 | -3.08032 | 0.000 | no  | Bos taurus Pvt1 oncogene conserved region 6                                                                           |
| URS000062B719 | 131  | 24   | 0.7015 | -0.1406256 | 0.001 | no  | 0.7015 | -0.11695 | 0.014 | no  | Bos taurus Prostate-specific transcript 1                                                                             |
| URS000062B8A2 | 204  | 24   | 0.4446 | 0.45463191 | 0.031 | no  | 0.4446 | 0.468966 | 0.067 | no  | Bos taurus Maternal intergenic circadian oscillating RNA 1                                                            |
| URS000062CBF8 | 135  | 15   | 1.0095 | 0.08828311 | 0.015 | no  | 1.0095 | 0.066005 | 0.044 | no  | Bos taurus Deleted in lymphocytic leukemia 2 conserved region 6                                                       |
| URS000062EA6D | 102  | 12   | 0.3194 | -1.5470274 | 0.000 | no  | 0.3194 | -1.53147 | 0.000 | no  | Bos taurus HOX antisense intergenic RNA myeloid 1 conserved region 4                                                  |
| URS000062F99B | 124  | 51   | 0.7689 | 0.02880937 | 0.007 | no  | 0.7689 | 0.007589 | 0.029 | no  | Bos taurus Pvt1 oncogene conserved region 3                                                                           |
| URS000063B8D5 | 85   | 0    | 0      | 0          | 0.000 | no  | 0      | 0        | 0.004 | no  | Bos taurus X-chromosome inactivation gene exon 1                                                                      |
| URS000063C398 | 76   | 0    | 0      | 0          | 0.000 | no  | 0      | 0        | 0.004 | no  | Bos taurus ZNRD1 antisense RNA 1 conserved region 2                                                                   |
| URS000063DD01 | 129  | 96   | 0.8591 | -0.2202319 | 0.003 | no  | 0.8591 | -0.2425  | 0.020 | no  | Bos taurus CDKN2B antisense RNA 1 conserved region 3                                                                  |
| URS000063E095 | 80   | 75   | 0.9386 | -0.23211   | 0.003 | no  | 0.9386 | -0.23885 | 0.020 | no  | Bos taurus Deleted in lymphocytic leukemia 2 conserved region 5                                                       |
| URS000063F98F | 146  | 21   | 0.7892 | -0.4194346 | 0.000 | no  | 0.7892 | -0.41721 | 0.005 | no  | Bos taurus Myocardial infarction associated transcript exon 5 conserved region 1                                      |
| URS0000641959 | 179  | 9    | 0.6695 | -1.1386872 | 0.000 | no  | 0.6695 | -1.15941 | 0.000 | no  | Bos taurus Pvt1 oncogene conserved region 4                                                                           |
| URS0000643C57 | 50   | 0    | 0      | 0          | 0.000 | no  | 0      | 0        | 0.004 | no  | Bos taurus H19 conserved region 1                                                                                     |
| URS000064A264 | 176  | 105  | 0.9142 | -0.244312  | 0.003 | no  | 0.9142 | -0.23639 | 0.024 | no  | Bos taurus NPPA antisense RNA 1 conserved region 1                                                                    |
| URS000064D7DB | 115  | 39   | 0.7422 | -0.4039124 | 0.000 | no  | 0.7422 | -0.36695 | 0.007 | no  | Bos taurus KCNQ1 overlapping transcript 1 conserved region 3                                                          |
| URS0000660D10 | 85   | 0    | 0      | 0          | 0.000 | no  | 0      | 0        | 0.004 | no  | Bos taurus Myocardial infarction associated transcript exon 5 conserved region 2                                      |
| URS0000662396 | 89   | 60   | 1.1772 | -0.651044  | 0.000 | no  | 1.1772 | -0.70488 | 0.005 | no  | Bos taurus Taurine upregulated gene 1 conserved region 2                                                              |
| URS000066403E | 107  | 69   | 0.5719 | -0.3791522 | 0.000 | no  | 0.5719 | -0.35714 | 0.006 | no  | Bos taurus Polled intersex syndrome regulated transcript 1                                                            |
| URS00006643D0 | 215  | 186  | 0.5145 | 0.08017167 | 0.019 | no  | 0.5145 | 0.097536 | 0.064 | no  | Bos taurus Six3os1 conserved region 2                                                                                 |
| URS0000665133 | 237  | 9    | 0.6218 | -1.8230951 | 0.000 | no  | 0.6218 | -1.55709 | 0.000 | no  | Bos taurus Hydatidiform mole associated and imprinted conserved region                                                |
| URS0000666A1B | 92   | 78   | 0.9769 | 0.01201435 | 0.016 | no  | 0.9769 | 0.037318 | 0.059 | no  | Bos taurus ZNFX1 antisense RNA 1 conserved region 2                                                                   |
| URS00006678DE | 168  | 9    | 0.876  | -1.8762211 | 0.000 | no  | 0.876  | -1.53144 | 0.000 | no  | Bos taurus FAS antisense RNA 1 conserved region                                                                       |
| URS0000668B27 | 210  | 39   | 0.8128 | -0.3463585 | 0.001 | no  | 0.8128 | -0.4175  | 0.006 | no  | Bos taurus HOXA11 antisense RNA 1 conserved region 5                                                                  |
| URS0000669E60 | 118  | 57   | 0.8845 | -0.3215334 | 0.001 | no  | 0.8845 | -0.38115 | 0.010 | no  | Bos taurus Highly accelerated region 1A/1B                                                                            |
| URS0000669F75 | 150  | 36   | 0.7222 | -0.1034753 | 0.002 | no  | 0.7222 | -0.11845 | 0.015 | no  | Bos taurus Rhabdomyosarcoma 2 associated transcript conserved region 10                                               |
| URS000066A9DA | 206  | 81   | 0.8972 | -0.3519839 | 0.001 | no  | 0.8972 | -0.39404 | 0.011 | no  | Bos taurus ST7 overlapping transcript 4 conserved region 4                                                            |
| URS000066CA78 | 70   | 24   | 0.8507 | -0.5007781 | 0.000 | no  | 0.8507 | -0.37277 | 0.007 | no  | Bos taurus JPX transcript, XIST activator conserved region 2                                                          |
| URS000066DB40 | 239  | 66   | 1.2803 | 0.22602503 | 0.132 | no  | 1.2803 | 0.221907 | 0.169 | no  | Bos taurus Taurine upregulated gene 1 conserved region 3                                                              |

|               |     |     |        |            |       |    |        |          |       |    |                                                                                  |
|---------------|-----|-----|--------|------------|-------|----|--------|----------|-------|----|----------------------------------------------------------------------------------|
| URS000066F704 | 277 | 174 | 0.7893 | 0.03494329 | 0.029 | no | 0.7893 | 0.004977 | 0.071 | no | Bos taurus SOX2 overlapping transcript exon 3                                    |
| URS000066F725 | 208 | 63  | 1.2486 | -0.5533622 | 0.001 | no | 1.2486 | -0.56091 | 0.011 | no | Bos taurus Six3os1 conserved region 7                                            |
| URS00006703D9 | 127 | 12  | 0.9238 | -0.5402292 | 0.000 | no | 0.9238 | -0.50023 | 0.005 | no | Bos taurus T-cell leukemia/lymphoma 6 conserved region 2                         |
| URS0000671CC7 | 151 | 60  | 1.0555 | -0.0020796 | 0.015 | no | 1.0555 | 0.017072 | 0.056 | no | Bos taurus FTX transcript, XIST regulator conserved region 3                     |
| URS0000673933 | 177 | 6   | 0.3194 | -3.3444442 | 0.000 | no | 0.3194 | -3.14823 | 0.000 | no | Bos taurus Taurine upregulated gene 1 conserved region 4                         |
| URS000067E11A | 215 | 72  | 1.104  | 0.12378344 | 0.045 | no | 1.104  | 0.144991 | 0.102 | no | Bos taurus DLG2 antisense RNA 1 conserved region 1                               |
| URS0000680E2C | 185 | 177 | 1.0005 | 0.12838402 | 0.099 | no | 1.0005 | 0.174034 | 0.182 | no | Bos taurus Pvt1 oncogene conserved region 1                                      |
| URS0000682766 | 223 | 6   | 0.3194 | -3.3444442 | 0.000 | no | 0.3194 | -3.14823 | 0.000 | no | Bos taurus Prostate androgen-regulated transcript 1 conserved region 1           |
| URS00006867A3 | 69  | 24  | 0.8507 | -0.5007781 | 0.000 | no | 0.8507 | -0.37277 | 0.007 | no | Bos taurus JPX transcript, XIST activator conserved region 2                     |
| URS000068C47E | 123 | 21  | 0.6706 | -0.9344654 | 0.000 | no | 0.6706 | -0.9314  | 0.001 | no | Bos taurus SPRY4-IT1 conserved region 2                                          |
| URS0000691107 | 97  | 15  | 0.3752 | -0.5360566 | 0.000 | no | 0.3752 | -0.64961 | 0.001 | no | Bos taurus Maternally expressed 8 exon 1                                         |
| URS0000693A09 | 374 | 69  | 0.8801 | 0.12245743 | 0.022 | no | 0.8801 | 0.177823 | 0.074 | no | Bos taurus HOXA transcript at the distal tip, conserved region 2                 |
| URS0000696C1D | 135 | 90  | 0.7435 | -0.0272282 | 0.007 | no | 0.7435 | -0.01036 | 0.035 | no | Bos taurus HOXB13 antisense RNA 1 conserved region 1                             |
| URS0000697ADE | 122 | 0   | 0      | 0          | 0.000 | no | 0      | 0        | 0.004 | no | Bos taurus WT1 antisense RNA conserved region 4                                  |
| URS000069BEA8 | 98  | 0   | 0      | 0          | 0.000 | no | 0      | 0        | 0.004 | no | Bos taurus Maternally expressed 8 exon 2                                         |
| URS00006A3960 | 201 | 189 | 0.8598 | -0.018075  | 0.030 | no | 0.8598 | -0.01015 | 0.085 | no | Bos taurus DAOA antisense RNA 1 conserved region 2                               |
| URS00006A711E | 271 | 57  | 0.627  | -0.289817  | 0.001 | no | 0.627  | -0.2342  | 0.010 | no | Bos taurus Six3os1 conserved region 5                                            |
| URS00006A7D6B | 198 | 0   | 0      | 0          | 0.000 | no | 0      | 0        | 0.004 | no | Bos taurus ST7 overlapping transcript 4 conserved region 1                       |
| URS00006A961C | 61  | 39  | 1.0075 | 0.13282328 | 0.026 | no | 1.0075 | 0.116644 | 0.062 | no | Bos taurus Rhabdomyosarcoma 2 associated transcript conserved region 1           |
| URS00006AAE04 | 85  | 36  | 0.8983 | 0.35988544 | 0.075 | no | 0.8983 | 0.35483  | 0.112 | no | Bos taurus NPPA antisense RNA 1 conserved region 3                               |
| URS00006AD16C | 129 | 87  | 0.4435 | -0.0253377 | 0.003 | no | 0.4435 | -0.00984 | 0.019 | no | Bos taurus WT1 antisense RNA conserved region 2                                  |
| URS00006AD459 | 105 | 9   | 0.6632 | -0.9039742 | 0.000 | no | 0.6632 | -0.98346 | 0.000 | no | Bos taurus Maternally expressed 3 conserved region 2                             |
| URS00006AE16B | 272 | 21  | 0.7803 | -1.0359179 | 0.000 | no | 0.7803 | -0.85649 | 0.001 | no | Bos taurus WT1 antisense RNA conserved region 8                                  |
| URS00006AEBC0 | 98  | 0   | 0      | 0          | 0.000 | no | 0      | 0        | 0.004 | no | Bos taurus HOTAIR conserved region 3                                             |
| URS00006B25E5 | 109 | 18  | 0.4709 | -0.3128058 | 0.000 | no | 0.4709 | -0.34822 | 0.004 | no | Bos taurus Rhabdomyosarcoma 2 associated transcript conserved region 3           |
| URS00006B2E3C | 166 | 84  | 0.7209 | 0.15808265 | 0.020 | no | 0.7209 | 0.129369 | 0.052 | no | Bos taurus HOXA transcript at the distal tip, conserved region 4                 |
| URS00006B6641 | 202 | 84  | 0.8651 | -0.0218437 | 0.010 | no | 0.8651 | -0.04986 | 0.036 | no | Bos taurus Rhabdomyosarcoma 2 associated transcript conserved region 6           |
| URS00006BB24D | 217 | 138 | 0.9914 | 0.02906229 | 0.035 | no | 0.9914 | 0.011574 | 0.083 | no | Bos taurus HOX antisense intergenic RNA myeloid 1 conserved region 2             |
| URS00006BE6E9 | 113 | 54  | 0.5573 | -0.5017926 | 0.000 | no | 0.5573 | -0.52344 | 0.003 | no | Bos taurus ST7 overlapping transcript 3 conserved region 3                       |
| URS00006C52CB | 173 | 0   | 0      | 0          | 0.000 | no | 0      | 0        | 0.004 | no | Bos taurus TTC28 antisense RNA 1 conserved region 3                              |
| URS00006C91FB | 196 | 33  | 0.6767 | 0.20344683 | 0.014 | no | 0.6767 | 0.271954 | 0.055 | no | Bos taurus Vax2os1 conserved region 3                                            |
| URS00006CB091 | 133 | 30  | 0.8607 | -0.0340372 | 0.005 | no | 0.8607 | -0.05183 | 0.025 | no | Bos taurus JPX transcript, XIST activator conserved region 1                     |
| URS00006CCFE8 | 99  | 69  | 1.0945 | 0.11334694 | 0.040 | no | 1.0945 | 0.102862 | 0.086 | no | Bos taurus MEST intronic transcript 1, antisense RNA conserved region            |
| URS00006CF2CE | 193 | 90  | 1.101  | 0.3749089  | 0.231 | no | 1.101  | 0.311005 | 0.191 | no | Bos taurus Rhabdomyosarcoma 2 associated transcript conserved region 9           |
| URS00006D0C82 | 383 | 18  | 0.9971 | -0.6064877 | 0.000 | no | 0.9971 | -0.46047 | 0.007 | no | Bos taurus Myocardial infarction associated transcript exon 5 conserved region 3 |
| URS00006D2A59 | 83  | 36  | 0.9707 | -0.129272  | 0.004 | no | 0.9707 | -0.1004  | 0.027 | no | Bos taurus NPPA antisense RNA 1 conserved region 3                               |
| URS00006D6D45 | 159 | 120 | 0.7575 | 0.18214124 | 0.038 | no | 0.7575 | 0.191946 | 0.088 | no | Bos taurus Nuclear enriched abundant transcript 1 conserved region 3             |
| URS00006D8830 | 56  | 36  | 0.9322 | 0.21146634 | 0.033 | no | 0.9322 | 0.255745 | 0.085 | no | Bos taurus HOXA transcript at the distal tip, conserved region 1                 |
| URS00006DCB57 | 191 | 54  | 0.6521 | -0.3547823 | 0.000 | no | 0.6521 | -0.35512 | 0.006 | no | Bos taurus Deleted in lymphocytic leukemia 1 conserved region 1                  |
| URS00006E0845 | 38  | 0   | 0      | 0          | 0.000 | no | 0      | 0        | 0.004 | no | Bos taurus GNAS antisense RNA 1 conserved region 3                               |



|               |       |      |        |            |       |     |        |          |       |     |                                                                                                    |
|---------------|-------|------|--------|------------|-------|-----|--------|----------|-------|-----|----------------------------------------------------------------------------------------------------|
| URS00006E2E2E | 92    | 78   | 1.1063 | 0.0950567  | 0.041 | no  | 1.1063 | 0.056084 | 0.079 | no  | Bos taurus ZNFX1 antisense RNA 1 conserved region 2                                                |
| URS00006E4C4E | 118   | 0    | 0      | 0          | 0.000 | no  | 0      | 0        | 0.004 | no  | Bos taurus ST7 antisense RNA 1 conserved region 1                                                  |
| URS00006E63B7 | 107   | 0    | 0      | 0          | 0.000 | no  | 0      | 0        | 0.004 | no  | Bos taurus Maternally expressed 8 exon 2                                                           |
| URS00006E88AE | 71    | 51   | 0.6392 | -0.2225712 | 0.001 | no  | 0.6392 | -0.27969 | 0.008 | no  | Bos taurus FTX transcript, XIST regulator conserved region 1                                       |
| URS00006FBAD6 | 179   | 126  | 0.9038 | -0.2132939 | 0.005 | no  | 0.9038 | -0.16021 | 0.036 | no  | Bos taurus HOXA11 antisense RNA 1 conserved region 6                                               |
| URS00006FEDB4 | 112   | 75   | 0.3852 | -0.1964278 | 0.001 | no  | 0.3852 | -0.2353  | 0.007 | no  | Bos taurus Non-protein coding RNA, upstream of F2R/PAR1 conserved region 1                         |
| URS0000703281 | 211   | 39   | 0.9198 | -0.2777535 | 0.001 | no  | 0.9198 | -0.44458 | 0.007 | no  | Bos taurus HOXA11 antisense RNA 1 conserved region 5                                               |
| URS0000703385 | 76    | 6    | 0.3299 | -2.901853  | 0.000 | no  | 0.3299 | -3.08032 | 0.000 | no  | Bos taurus CLRN1 antisense RNA 1 conserved region                                                  |
| URS0000705FA5 | 122   | 18   | 0.8956 | -0.6394999 | 0.000 | no  | 0.8956 | -0.64138 | 0.003 | no  | Bos taurus Deleted in lymphocytic leukemia 2 conserved region 1                                    |
| URS000071003F | 98    | 63   | 0.8698 | 0.48692793 | 0.186 | no  | 0.8698 | 0.520013 | 0.210 | no  | Bos taurus HOXA11 antisense RNA 1 conserved region 3                                               |
| URS0000710D82 | 223   | 60   | 0.8505 | -0.4381931 | 0.000 | no  | 0.8505 | -0.39521 | 0.009 | no  | Bos taurus Prostate androgen-regulated transcript 1 conserved region 1                             |
| URS00007164B5 | 194   | 54   | 0.7073 | -0.1455383 | 0.002 | no  | 0.7073 | -0.24467 | 0.011 | no  | Bos taurus KCNQ1 overlapping transcript 1 conserved region 2                                       |
| URS0000719068 | 232   | 78   | 0.7878 | -0.1269287 | 0.004 | no  | 0.7878 | -0.11622 | 0.024 | no  | Bos taurus WT1 antisense RNA conserved region 3                                                    |
| URS0000720259 | 105   | 0    | 0      | 0          | 0.000 | no  | 0      | 0        | 0.004 | no  | Bos taurus GNAS antisense RNA 1 conserved region 1                                                 |
| URS000072B58A | 126   | 0    | 0      | 0          | 0.000 | no  | 0      | 0        | 0.004 | no  | Bos taurus GNAS antisense RNA 1 conserved region 4                                                 |
| URS000072C9A4 | 105   | 9    | 0.6632 | -0.9039742 | 0.000 | no  | 0.6632 | -0.98346 | 0.000 | no  | Bos taurus Maternally expressed 3 conserved region 2                                               |
| URS000072DC14 | 201   | 81   | 0.8558 | -0.0937773 | 0.006 | no  | 0.8558 | -0.11216 | 0.028 | no  | Bos taurus DAOA antisense RNA 1 conserved region 1                                                 |
| URS0000751D1A | 820   | 324  | 0.8015 | 0.07230413 | 0.161 | no  | 0.8015 | 0.11947  | 0.262 | no  | Bos taurus (cattle) X5                                                                             |
| URS0000759E9B | 22812 | 567  | 0.48   | -0.058008  | 0.097 | no  | 0.48   | -0.06463 | 0.277 | no  | Bos taurus X (inactive)-specific transcript (XIST), long non-coding RNA.                           |
| URS000075A02E | 1894  | 306  | 0.6476 | -0.0680364 | 0.035 | no  | 0.6476 | -0.03546 | 0.113 | no  | Bos taurus uncharacterized LOC100848703 (LOC100848703), long non-coding RNA.                       |
| URS000075AAC6 | 930   | 177  | 0.9069 | 0.16822608 | 0.093 | no  | 0.9069 | 0.171259 | 0.153 | no  | Bos taurus uncharacterized LOC100196901 (LOC100196901), transcript variant 2, long non-coding RNA. |
| URS000075AD92 | 751   | 144  | 0.6445 | -0.1496252 | 0.004 | no  | 0.6445 | -0.17596 | 0.023 | no  | Bos taurus uncharacterized LOC100848574 (LOC100848574), transcript variant 7, long non-coding RNA. |
| URS000075B437 | 926   | 177  | 0.9069 | 0.16822608 | 0.093 | no  | 0.9069 | 0.171259 | 0.153 | no  | Bos taurus uncharacterized LOC100196901 (LOC100196901), transcript variant 3, long non-coding RNA. |
| URS000075B61B | 886   | 144  | 0.6445 | -0.1496252 | 0.004 | no  | 0.6445 | -0.17596 | 0.023 | no  | Bos taurus uncharacterized LOC100848574 (LOC100848574), transcript variant 5, long non-coding RNA. |
| URS000075B744 | 2851  | 2676 | 1.1013 | 0.33495888 | 1.000 | yes | 1.1013 | 0.329076 | 1.000 | yes | Bos taurus PPARG-TSEN2 (PPARG-TSEN2), transcript variant 2, long non-coding RNA.                   |
| URS000075BB85 | 892   | 114  | 0.6841 | 0.02240328 | 0.010 | no  | 0.6841 | 0.042168 | 0.044 | no  | Bos taurus antisense IGF2R RNA noncoding (AIRN), long non-coding RNA.                              |
| URS000075C9BA | 795   | 111  | 0.9282 | 0.05455613 | 0.025 | no  | 0.9282 | 0.07886  | 0.076 | no  | Bos taurus uncharacterized LOC100616526 (LOC100616526), transcript variant 2, long non-coding RNA. |
| URS000075CB6C | 1120  | 147  | 0.894  | 0.0876376  | 0.040 | no  | 0.894  | 0.048664 | 0.082 | no  | Bos taurus uncharacterized LOC100848574 (LOC100848574), transcript variant 1, long non-coding RNA. |
| URS000075DFAF | 777   | 135  | 0.7837 | -0.1091227 | 0.007 | no  | 0.7837 | -0.11944 | 0.035 | no  | Bos taurus small nucleolar RNA host gene 3 (non-protein coding) (SNHG3), long non-coding RNA.      |
| URS00001A8549 | 918   | 543  | 1.1996 | 0.36515742 | 0.980 | yes | 1.1996 | 0.376433 | 0.908 | yes | Bos taurus (cattle) partial PEG11 antisense RNA                                                    |
| URS000061E61B | 644   | 189  | 0.7462 | -0.1219713 | 0.010 | no  | 0.7462 | -0.14049 | 0.044 | no  | Bos taurus (cattle) noncoding RNA                                                                  |
| URS0000626285 | 61    | 6    | 0.3621 | 1.18215914 | 0.712 | yes | 0.3621 | 1.040412 | 0.302 | no  | Bos taurus ZEB2 antisense RNA 1 conserved region 2                                                 |
| URS000062C8E7 | 67    | 15   | 0.6556 | 0.07351687 | 0.005 | no  | 0.6556 | 0.056913 | 0.022 | no  | Bos grunniens H19 conserved region 2                                                               |
| URS000063BDFC | 58    | 3    | 0.3299 | 0          | 0.001 | no  | 0.3299 | 0        | 0.009 | no  | Ovis aries HOX antisense intergenic RNA myeloid 1 conserved region 3                               |
| URS00006515F5 | 126   | 54   | 0.9473 | 0.13648592 | 0.026 | no  | 0.9473 | 0.149701 | 0.069 | no  | Ovis aries X-chromosome inactivation gene exon 4                                                   |

|               |     |     |        |            |       |    |        |          |       |    |                                                                                                    |
|---------------|-----|-----|--------|------------|-------|----|--------|----------|-------|----|----------------------------------------------------------------------------------------------------|
| URS0000667B4F | 76  | 0   | 0      | 0          | 0.000 | no | 0      | 0        | 0.004 | no | Ovis aries Deleted in lymphocytic leukemia 2 conserved region 3                                    |
| URS000067C63C | 125 | 123 | 1.1507 | 0.04518516 | 0.054 | no | 1.1507 | 0.049557 | 0.113 | no | Bos taurus H19 conserved region 3                                                                  |
| URS000068C069 | 46  | 0   | 0      | 0          | 0.000 | no | 0      | 0        | 0.004 | no | Ovis aries CDKN2B antisense RNA 1 conserved region 2                                               |
| URS000069115D | 96  | 48  | 0.8041 | -0.1356044 | 0.003 | no | 0.8041 | -0.10815 | 0.020 | no | Bos taurus HOXA11 antisense RNA 1 conserved region 1                                               |
| URS000069C46C | 71  | 33  | 1.0113 | -0.0135459 | 0.009 | no | 1.0113 | -0.08887 | 0.029 | no | Bos taurus Ghrelin opposite strand RNA conserved region                                            |
| URS00006A38EC | 125 | 111 | 0.9834 | 0.221769   | 0.087 | no | 0.9834 | 0.212901 | 0.133 | no | Bos taurus SMAD5 antisense RNA 1 conserved region 3                                                |
| URS00006BA301 | 186 | 24  | 0.7776 | -0.4064206 | 0.000 | no | 0.7776 | -0.2448  | 0.010 | no | Ovis aries HOXA11 antisense RNA 1 conserved region 2                                               |
| URS00006BB01F | 140 | 27  | 0.5365 | -0.3212849 | 0.000 | no | 0.5365 | -0.44433 | 0.003 | no | Ovis aries FTX transcript, XIST regulator conserved region 4                                       |
| URS00006D6533 | 105 | 54  | 1.0745 | 0.32541807 | 0.120 | no | 1.0745 | 0.334339 | 0.158 | no | Bos taurus ST7 antisense RNA 1 conserved region 2                                                  |
| URS00006DD98B | 78  | 51  | 0.8067 | -0.8603869 | 0.000 | no | 0.8067 | -0.83543 | 0.001 | no | Ovis aries ZEB2 antisense RNA 1 conserved region 4                                                 |
| URS00006FC8F0 | 99  | 51  | 0.8301 | -0.1825912 | 0.002 | no | 0.8301 | -0.20831 | 0.015 | no | Bos taurus MEST intronic transcript 1, antisense RNA conserved region                              |
| URS00006FECED | 151 | 84  | 0.7746 | -0.0439212 | 0.006 | no | 0.7746 | -0.06789 | 0.029 | no | Bos taurus Non-coding RNA BC040587                                                                 |
| URS0000709DD8 | 124 | 0   | 0      | 0          | 0.000 | no | 0      | 0        | 0.004 | no | Bos taurus GNAS antisense RNA 1 conserved region 5                                                 |
| URS000070AAE0 | 109 | 0   | 0      | 0          | 0.000 | no | 0      | 0        | 0.004 | no | Bos taurus SOX2 overlapping transcript exon 4                                                      |
| URS00007294CE | 76  | 57  | 0.5418 | -0.2044881 | 0.001 | no | 0.5418 | -0.15935 | 0.011 | no | Ovis aries ZNRD1 antisense RNA 1 conserved region 2                                                |
| URS000075E02A | 947 | 84  | 0.5671 | -0.2743852 | 0.001 | no | 0.5671 | -0.26996 | 0.009 | no | Bos taurus uncharacterized LOC100848574 (LOC100848574), transcript variant 3, long non-coding RNA. |

**Table S4 Sequence conservation of BLV AS1 and Tax sequences**

|                    | AS1                      | AS1 3rd               | AS1 no overlap         | AS1 no overlap 3rd     | Tax                     | Tax 3rd                 |
|--------------------|--------------------------|-----------------------|------------------------|------------------------|-------------------------|-------------------------|
| AS1                | <b>0.01485<br/>(264)</b> | 0.0286                | 0.3265                 | 0.0198                 | 0.2995                  | 0.1298                  |
| AS1 3rd            |                          | <b>0.034<br/>(88)</b> | 0.4859                 | 0.4595                 | 0.0011                  | 0.4105                  |
| AS1 no overlap     |                          |                       | <b>0.0236<br/>(72)</b> | 0.2278                 | 0.0382                  | 0.9165                  |
| AS1 no overlap 3rd |                          |                       |                        | <b>0.0521<br/>(24)</b> | 0.0035                  | 0.1246                  |
| Tax                |                          |                       |                        |                        | <b>0.0106<br/>(930)</b> | 0.0031                  |
| Tax 3rd            |                          |                       |                        |                        |                         | <b>0.0247<br/>(170)</b> |

Sequence conservation of BLV AS1 and Tax sequences using sequence data from 12 bovine and 28 ovine tumors supplemented with six publicly available whole genome BLV sequences from NCBI

AS1: sequence segment corresponding to the putative protein coding sequence of AS1

AS1 3rd: 3rd codon positions of the putative protein coding sequence of AS1

AS1 no overlap: segment corresponding to the putative protein coding sequence of AS1 that does not overlap with R3 or G4

AS1 no overlap 3rd: 3rd codon positions of the putative protein coding sequence of AS1 that does not overlap with R3 or G4

Tax: full length Tax coding sequence, Tax 3rd: 3rd codon positions of the segment of Tax that does not overlap with Rex

Diagonal: nucleotide diversity (= average difference per nucleotide site across all pairs of isolates) for the corresponding sequence segment, and – between brackets – number of corresponding nucleotide positions. Off-diagonal: p-value of the differences between corresponding nucleotide diversities.

## Table S5 Oligos used

BLV genome coordinates correspond to the provirus found in the YR2 cell line (NCBI Accession: KT122858)

### End point PCR oligos

| Name    | Forward 5'-3'        | Reverse 5'-3'        | Region                            |
|---------|----------------------|----------------------|-----------------------------------|
| AS1-S/L | TCCCTTCTGTTTCCACAACG | CAGAGGACCGGAGATAGAGC | BLV:7121-8564                     |
| AS1-L   | CCCCTAAACCCGATTCTGAT | CAGAGGACCGGAGATAGAGC | BLV:6263-8564                     |
| AS2     | CCCAGTCTCTTCTGGTGTCC | CAGAGGACCGGAGATAGAGC | BLV:2782-8564                     |
| ACTB    | GACAAATGGTTCGGCATGTG | TCCCTGATGTCACGCAAT   | chr11:50421140-50422030 (oviAri3) |

### Real Time PCR oligos for use with sybr green

| Name           | Forward 5'-3'          | Reverse 5'-3'           | Region                           |
|----------------|------------------------|-------------------------|----------------------------------|
| Tax            | GCCTTCAAATGCCAAAGAAC   | CAACCAACAACACTTGCCATC   | BLV:4818-7267                    |
| Env-Tax-Rex-R3 | TCCTTCTCCCGAGACCTT     | CTAGCCACCGAGCATTTGTTT   | BLV:262-4712                     |
| AS1            | TCCCTTCTGTTTCCACAACG   | CTTCTGGTCCGCCAACTC      | BLV:7121-8404                    |
| AS2            | TTTCGAACGGGCACTACAG    | CTTCTGGTCCGCCAACTC      | BLV:2732-8404                    |
| TBP            | CTTGACCTAAAGACCATTGCAC | CCATCTTCCCAGAGTGAATATC  | chr8:90670093-90671593 (oviAri3) |
| HPRT1          | GACCAGTCAACAGCGGACAT   | CTTGACCAAGGCAAGCAAAG    | chrX:95382926-95389315 (oviAri3) |
| U6             | CTCGCTTCGGCAGCACATATAC | GGAACGCTTACGAAATTTGCGTG | U6 Small nuclear RNA             |
| Tyr-tRNA       | CCTTCGATAGCTCAGTTGGT   | GTCCTTCGAGCCGGAATC      | Tyrosine transfer RNA            |

### PrimeTime qPCR Assays (Integrated DNA Technologies)

|           | Forward 5'-3'          | Probe                                             | Reverse 5'-3'          | Region                                |
|-----------|------------------------|---------------------------------------------------|------------------------|---------------------------------------|
| AS1 cDNA  | TCCCTTCTGTTTCCACAACG   | /56-FAM/AAGCTCTTC/zen/GGATCCATTACCTGC/3IAbkFQ/    | CTTCTGGTCCCGCTAACTC    | BLV:7121-8404                         |
| AS2 cDNA  | TTTCGAACGGGCACTACAG    | /56-FAM/CCGCTTCT/zen/CCCAGTCTCTCT/3IAbkFQ/        | CTTCTGGTCCCGCTAACTC    | BLV:2732-8404                         |
| TAX cDNA  | GCCTTCAAATGCCAAAGAAC   | /56-FAM/TGATGATCG/zen/GTTGTGGCGTCTTC/3IAbkFQ/     | CAACCAACAACACTTGCCATC  | BLV:4818-7267                         |
| RPS9 cDNA | TGACGCTGGATGAGAAAGAC   | /56-FAM/CTGTTCGAA/zen/GGTAATGCCCTG/3IAbkFQ/       | CTTCAGGCCAGGATGTAATC   | chr14:60,263,509-60,268,300 (oviAri3) |
| TBP cDNA  | CTTGACCTAAAGACCATTGCAC | /56-FAM/TGCCCGAAA/zen/TGCTGAGTATAATCCCAA/3IAbkFQ/ | CCATCTTCCCAGAGTGAATATC | chr8:90670093-90671593 (oviAri3)      |
| BLV DNA   | CTTACAACGCTTCCTCCATGAC | /56-FAM/ACGCTCAC/zen/TGGTCAGAATTGGTT/3IAbkFQ/     | GGCGGGAGAGCCATTTATTT   | BLV:5806-5916                         |
| RPS9 DNA  | TGGATGTTGGTATTGGGTGG   | /56-FAM/TTCTGGTCT/zen/CAGGGAACTTGTGG/3IAbkFQ/     | CCCTGTGCATCTCTTTGTC    | chr18:63386124-63386267 (BosTau6)     |

### Oligos for Luciferase assays

| Name    | Forward 5'-3'                      | Reverse 5'-3'                     | Region                |
|---------|------------------------------------|-----------------------------------|-----------------------|
| 5'LTR   | TGACGCTAGCTGTATGAAAGATCATGCCGACCT  | TGACAAGCTTACGAGCCCCAATTGTTT       | BLV:1-544             |
| 3'LTR   | TGACAAGCTTTGAGGGGAGTCAATTTGTATG    | TGACGCTAGCTGTTTGGCGGTCTCTCT       | BLV:8175-8720         |
| 3'LTRA  | TGACAAGCTTTGCTGACCTCACCTGCTGATA    | TGACGCTAGCTGTTTGGCGGTCTCTCT       | BLV:8342-8720         |
| mut DAS | CCTCTGACCGTCTCCATCAGGACTCTCTCTCTTG | CAAGAGAGAGAGTCTGATGGAGACGGTCAGAGG | BLV:370-403/8559-8592 |
| mut IRF | GTTTCCGTCTTACAGTCTGTGTCTCGCGGCCCG  | GCGGGCCGAGACACAGACTGTAAGACAGGAAAC | BLV:450-484/8639-8673 |

### Oligos for producing altered pBLV344

| Name     | Forward 5'-3'                 | Reverse 5'-3'               | Region                                                  | Additional info           |
|----------|-------------------------------|-----------------------------|---------------------------------------------------------|---------------------------|
| up_miR   | CCACCTGGTACTCTTCCAA           | TGACAGCGCTGTGAACATGGGGGTGTC | BLV:3268-6388                                           | Region upstream of miRs   |
| down_miR | TGACAGCGCTTAGACCCCTAACGGAGGTT | AAGCAGAAAGAACGCTCGAA        | BLV:6943--6962 & *chr12:59,152,995-59,153,014 (oviAri3) | Region downstream of miRs |
| amp_lig  | CCACCTGGTACTCTTCCAA           | GCGGGAGAGCCATTTATTTT        | BLV:3268-8168                                           | Amplifies ligated DNA     |
| amp_miR  | TGACAGCGCTGACCCCTCAGGCTGTGG   | TGACAGCGCTGAAACCCGGGCTTG    | BLV:6389-6942                                           | Amplifies miR region      |

Red bases = restriction recognition site, \*pBLV344 contains flanking DNA derived from the host

**Oligos for 5'RACE**

| Description                              | Oligo 5'-3'                                                        |
|------------------------------------------|--------------------------------------------------------------------|
| GeneRacer 5' Nested With Nextera Forward | <b>TCGTCGGCAGCGTCAGATGTGTATAAGAGACAGGGACACTGACATGGACTGAAGGAGTA</b> |
| 5'RACE AS1 + Nextera Reverse             | <b>GTCTCTGGGGCTCGGAGATGTGTATAAGAGACAGGGCTGCCCTGCATCTTCTA</b>       |
| 5'RACE AS2 + Nextera Reverse             | <b>GTCTCTGGGGCTCGGAGATGTGTATAAGAGACAGCCAGTCTTCTTCTGGTGTC</b>       |

Bold = region corresponding to either the nextera reverse or forward

**Oligos for 3'RACE with GeneRacer oligo**

| Description                               | Oligo 5'-3'                                              |
|-------------------------------------------|----------------------------------------------------------|
| GeneRace3                                 | GCTGTCAACGATACGCTACGTAACGGCATGACAGTGTTTTTTTTTTTTTTTTTT   |
| PCR1 GeneRacer3                           | GCTGTCAACGATACGCTACGTAACG                                |
| PCR1 BLV LTR (8489-8508)                  | GTGGTTTGCCTTACCTGACC                                     |
| PCR2 GeneRacer3 nest with Nextera Forward | TCGTCGGCAGCGTCAGATGTGTATAAGAGACAGCGCTACGTAACGGCATGACAGTG |
| PCR2 BLV LTR (8405-8424)                  | AGGGTCTCAGGAGGAGAAGC                                     |

Bold = region corresponding to either the nextera reverse or forward

**Oligos for 3'RACE with oligo dT + Nextera**

| Description                           | Oligo 5'-3'                                         |
|---------------------------------------|-----------------------------------------------------|
| Oligo dT tailed wtihi Nextera reverse | GTCTCTGGGGCTCGGAGATGTGTATAAGAGACAGTTTTTTTTTTTTTTTTT |
| PCR1 BLV LTR (8489-8508)              | GTGGTTTGCCTTACCTGACC                                |
| PCR1 Nextera reverse                  | <b>GTCTCTGGGGCTCGGAGAT</b>                          |
| PCR2 BLV LTR (8405-8424)              | AGGGTCTCAGGAGGAGAAGC                                |
| PCR2 Nextera reverse                  | <b>GTCTCTGGGGCTCGGAGAT</b>                          |

Bold = region corresponding to either the nextera reverse or forward

**Nextera Based oligos annealed together and ligated to fragmented 3'RACE PCR**

|                 |                                                  |
|-----------------|--------------------------------------------------|
| Nextera Forward | TCGTCGGCAGCGTCAGATGTGTATAAGAGACAGT               |
| Nextera Reverse | /5Phos/ <b>CTGTCTCTTATACACATCTCCGAGCCACGAGAC</b> |

Bold = region of complementarity in oligos

**Oligos for 3'RACE with GeneRacer oligo primer adjacent to end of AS1-L**

| Description                          | Oligo 5'-3'                                                   |
|--------------------------------------|---------------------------------------------------------------|
| BLV (5393-5412) + Nextera Reverse    | <b>GTCTCTGGGGCTCGGAGATGTGTATAAGAGACAGCTGACAGAGGGAACCCAGTC</b> |
| GeneRacer3 nest with Nextera Forward | TCGTCGGCAGCGTCAGATGTGTATAAGAGACAGCGCTACGTAACGGCATGACAGTG      |

**Oligos for 3'RACE using GeneRacer oligo for MinION sequencing**

| Description              | Oligo 5'-3'                                                      |
|--------------------------|------------------------------------------------------------------|
| GeneRace3                | GCTGTCAACGATACGCTACGTAACGGCATGACAGTGTTTTTTTTTTTTTTTTTT           |
| PCR1 GeneRacer3          | GCTGTCAACGATACGCTACGTAACG                                        |
| PCR1 BLV LTR (8489-8508) | GTGGTTTGCCTTACCTGACC                                             |
| PCR2 GeneRacer3          | CGTACGTAACGGCATGACAGTG                                           |
| PCR2 BLV LTR (8405-8424) | <b>GGTGCTGAAGAAGTTGTCGGTGTCTTTGTGTTAACCTAGGGTCTCAGGAGGAGAAGC</b> |

Bold = MinION barcode 1

**Oligos for modified 5' RACE to detect RNA cleavage**

| Description PCR1 oligos   | Oligo 5'-3'             |
|---------------------------|-------------------------|
| GeneRacer 5' Primer       | CGACTGGAGCACGAGGACACTGA |
| miR1-RACE (BLV:6357-6376) | TCGACCCCTGCCCTTGACACC   |
| miR2-RACE (BLV:6454-6473) | CTTGTGCCAGCGCCGAGTT     |
| miR3-RACE (BLV:6584-6603) | GCCCTCCCGTTGCCGTGTGAC   |

|                           |                          |
|---------------------------|--------------------------|
| miR4-RACE (BLV:6682-6703) | GGGCGATTTCTTGCAGCTGTGC   |
| miR5-RACE (BLV:6803-6827) | TACGCCCTGTTCACACCCCTTCTA |

| Description PCR2 oligos                         | Oligo 5'-3'                                                         |
|-------------------------------------------------|---------------------------------------------------------------------|
| GeneRacer 5' Nested Primer with Nextera Forward | <b>TCGTCGGCAGCCTCAGATGTGTATAAGAGACAG</b> GGACACTGACATGGACTGAAGGAGTA |
| miR1-Nest + Nextera Reverse                     | <b>GTCTCGTGGGCTCGGAGATGTGTATAAGAGACAG</b> CCATGTTTCACGCACCCCTCA     |
| miR2-Nest + Nextera Reverse                     | <b>GTCTCGTGGGCTCGGAGATGTGTATAAGAGACAG</b> CCCTACCCTGACCCCTCTCTG     |
| miR3-Nest + Nextera Reverse                     | <b>GTCTCGTGGGCTCGGAGATGTGTATAAGAGACAG</b> CCCTCTCACTTCTGCTTACCA     |
| miR4-Nest + Nextera Reverse                     | <b>GTCTCGTGGGCTCGGAGATGTGTATAAGAGACAG</b> CAGCTGTGCTAAGCGAGAGG      |
| miR5-Nest + Nextera Reverse                     | <b>GTCTCGTGGGCTCGGAGATGTGTATAAGAGACAG</b> ATCTCAGCTCGCACCCCAAG      |

Bold = region corresponding to either the nextera reverse or forward

#### Oligos for High-throughput sequencing of BLV integration sites

| Description Oligos annealed to make adapter | Oligo 5'-3'                                                                |
|---------------------------------------------|----------------------------------------------------------------------------|
| Linker-Long                                 | TCATGATCAATGGGACGATCAGTCTCGTGGGCTCGGAGATGTGTATAAGAGACAGNNNNNNNGCTCTCCGATCT |
| Linker-Short                                | /5Phos/GATCGGAAGAGCGAAAAAAAAAAAAA                                          |

| Description PCR1 oligos | Oligo 5'-3'              |
|-------------------------|--------------------------|
| Link-PCR1               | TCATGATCAATGGGACGATCAGTC |
| BLV-5' END              | GCAGCTGACGTCTCTGTCTG     |
| BLV-3' END              | AGCTCTATCTCCGGTCTCT      |

| Description PCR2 oligos | Oligo 5'-3'                                                  |
|-------------------------|--------------------------------------------------------------|
| Link-PCR2               | GTCTCGTGGGCTCGGAGAT                                          |
| BLV-5' END-2            | TCGTCGGCAGCCTCAGATGTGTATAAGAGACAGNNNNNNNGGCTCCTAGGTCGGCATGAT |
| BLV-3' END-2            | TCGTCGGCAGCCTCAGATGTGTATAAGAGACAGNNNNNNCTAGCGCCAGGAGAGACC    |

#### Locked nucleic acid antisense oligos for AS transcript knockdown

| Name        | Oligo 5'-3'      | Region                                           |
|-------------|------------------|--------------------------------------------------|
| BLV_AS_LNA1 | CCAAGTGTGCACAATA | BLV:6994-7009                                    |
| BLV_AS_LNA2 | TACCTGCTGATAAAC  | BLV:7215-7217 & 8353-8365 covers AS1 splice site |
| BLV_AS_LNA3 | AGCGTTCTCTCTGAG  | BLV:8403-8419 Common to AS1 & AS2                |
